# Supplementary material
Source: PubMed Central journal article supplement (PMC4107101)
Supplement: 14_003_Spiegelberg.Suppl.pdf [file 14_003_Spiegelberg.Suppl.pdf]

## Supplemental Data

# Gene Expression Analysis Reveals Inhibition of Radiation-Induced TGF $\beta$ -Signaling by Hyperbaric Oxygen Therapy in Mouse Salivary Glands

Linda Spiegelberg,<sup>1</sup> Sigrid MA Swagemakers,<sup>2</sup> Wilfred FJ van IJcken,<sup>3</sup> Edwin Oole,<sup>3</sup> Eppo B Wolvius,<sup>1</sup> Jeroen Essers,<sup>4,5,6</sup> Joanna AM Braks<sup>1</sup>

Online address: <http://www.molmed.org>

The Feinstein Institute  
for Medical Research 

Empowering Imagination. Pioneering Discovery.®

**Supplementary Table S1.** Primers used for qPCR.

| Gene                           | Forward (5'-3')        | Reverse (5'-3')         |
|--------------------------------|------------------------|-------------------------|
| <i><math>\alpha</math>-Sma</i> | CCAGCTATGTGTGAAGAGGAAG | TCCAACCATTACTCCCTGATGTC |
| <i>Btg2</i>                    | AAGAGAACCGACATGCTCCC   | GTAATGATCGGTACAGTGCCTC  |
| <i>Cd83</i>                    | GGCCAAGGTCTCCGAGAGTG   | CCTCGAAGGAGCTGTTTTGC    |
| <i>Ctgf</i>                    | CCCTAGCTGCCTACCGACTG   | TTAGAACAGGCGCTCCACTC    |
| <i>Cyr61</i>                   | AAGAGGCTTCCTGTCTTTGGC  | AGACGTGGTCTGAACGATGC    |
| <i>Egr1</i>                    | TGAGCACCTGACCACAGAGTC  | TAACTCGTCTCCACCATCGC    |
| <i>Egr2</i>                    | TACCCGGTGGAAGACCTCG    | ATGTTGATCATGCCATCTCC    |
| <i>Gapdh</i>                   | AAGGGCTCATGACCACAGTC   | TGCAGGGATGATGTTCTGGG    |
| <i>Serpine1</i>                | ACAACCCGACAGAGACAATCC  | ATGAAGGCGTCTCTTCCCAC    |
| <i>Sox2</i>                    | GCTGCCTCTTTAAGACTAGGGC | CGCCGCGATTGTTGTGATTAG   |
| <i>Tfr</i>                     | GAGGCGCTTCCTAGTACTCC   | CTTGCCGAGCAAGGCTAAAC    |
| <i>Tgf<math>\beta</math>1</i>  | CCCGAAGCGGACTACTATGC   | CATAGATGGCGTTGTTGCGG    |
| <i>Thbs1</i>                   | CGATGAGTGCAAAGAAGTGCC  | TGAGCCAGTGAATCGTGGTG    |

Forward and reverse primers used for qPCR.

Supplementary Table S2. RT vs. Control.

| Symbol    | Gene name                                                               | Fold change up | Symbol                  | Gene name                                                                                 | Fold change down |
|-----------|-------------------------------------------------------------------------|----------------|-------------------------|-------------------------------------------------------------------------------------------|------------------|
| DBP       | D site of albumin promoter (albumin D-box) binding protein              | 93.6           | ARNTL                   | aryl hydrocarbon receptor nuclear translocator-like                                       | 9.640            |
| ATF3      | activating transcription factor 3                                       | 12.3           | NPAS2                   | neuronal PAS domain protein 2                                                             | 6.203            |
| EGR3      | early growth response 3                                                 | 10.4           | CXCL13                  | chemokine (C-X-C motif) ligand 13                                                         | 4.059            |
| USP2      | ubiquitin specific peptidase 2                                          | 7.9            | IGJ                     | immunoglobulin J polypeptide, linker protein for immunoglobulin alpha and mu polypeptides | 4.047            |
| FOS       | FBJ murine osteosarcoma viral oncogene homolog                          | 7.1            | FoH1                    | folate hydratase 1                                                                        | 3.180            |
| Ptn1/Ptp2 | proline rich protein Haellii subfamily 1                                | 6.8            | IGHA1                   | immunoglobulin heavy constant alpha 1                                                     | 3.147            |
| EGR1      | early growth response 1                                                 | 6.5            | IgIV1                   | immunoglobulin lambda variable 1                                                          | 2.811            |
| PER1      | period circadian clock 1                                                | 6.2            | Zc3h12D                 | zinc finger CCHC-type containing 12D                                                      | 2.757            |
| DUSP4     | dual specificity phosphatase 4                                          | 5.6            | ARL4A                   | ADP-ribosylation factor-like 4A                                                           | 2.547            |
| CA3       | carbonic anhydrase III, muscle specific                                 | 4.9            | IGHM                    | immunoglobulin heavy constant mu                                                          | 2.437            |
| PER2      | period circadian clock 2                                                | 4.8            | Tgfp1/Tgfp2             | T cell specific GTPase 1                                                                  | 2.410            |
| GDF15     | growth differentiation factor 15                                        | 4.6            | RHOJ                    | ras homolog family member J                                                               | 2.395            |
| PAG1      | phosphoprotein associated with glycosphingolipid microdomains 1         | 4.5            | CLDN1                   | claudin 1                                                                                 | 2.392            |
| CFD       | complement factor D (adpsin)                                            | 4.4            | Mup1 (includes others)  | —                                                                                         | 2.375            |
| CYR61     | cysteine-rich, angiogenic inducer, 61                                   | 4.3            | MZB1                    | marginal zone B and B1 cell-specific protein                                              | 2.341            |
| THBS1     | —                                                                       | 4.3            | BMF                     | Bcl2 modifying factor                                                                     | 2.233            |
| EGR2      | early growth response 2                                                 | 4.2            | Gbp6 (includes others)  | guanylate binding protein 6                                                               | 2.227            |
| CHAC1     | ChaC, cation transport regulator homolog 1 (E. coli)                    | 4.0            | RAB17                   | RAB17, member RAS oncogene family                                                         | 2.224            |
| JUN       | Jun proto-oncogene                                                      | 3.9            | OSGIN2                  | oxidative stress induced growth inhibitor family member 2                                 | 2.088            |
| EDA2R     | ectodysplasin A2 receptor                                               | 3.8            | GPR31                   | G protein-coupled receptor 31                                                             | 2.020            |
| COG10B    | coenzyme Q10 homolog B (S. cerevisiae)                                  | 3.8            | RAB27B                  | RAB27B, member RAS oncogene family                                                        | 2.006            |
| NRA3      | nuclear receptor subfamily 4, group A, member 3                         | 3.7            | ASGR1                   | asialoglycoprotein receptor 1                                                             | 1.960            |
| TEF       | thymotrophic embryonic factor                                           | 3.7            | PIGR                    | polymeric immunoglobulin receptor                                                         | 1.953            |
| CDKN1A    | cyclin-dependent kinase inhibitor 1A (p21, Cip1)                        | 3.7            | LRG1                    | leucine-rich alpha-2-glycoprotein 1                                                       | 1.941            |
| IRS2      | insulin receptor substrate 2                                            | 3.7            | Igfp1                   | interferon inducible GTPase 1                                                             | 1.936            |
| GPR155    | G protein-coupled receptor 155                                          | 3.5            | C730049O14Rk            | RIKEN cDNA C730049O14 gene                                                                | 1.932            |
| CTGF      | connective tissue growth factor                                         | 3.4            | PSMB9                   | proteasome (prosome, macropain) subunit, beta type, 9                                     | 1.916            |
| EPHX1     | epoxide hydratase 1, microsomal (xenobiotic)                            | 3.4            | TMEM140                 | transmembrane protein 140                                                                 | 1.908            |
| CGRM4L    | CCRG4 carbon catabolite repression 4-like (S. cerevisiae)               | 3.3            | PPP1R3C                 | protein phosphatase 1, regulatory subunit 3C                                              | 1.907            |
| DUSP1     | dual specificity phosphatase 1                                          | 3.3            | SERPINA3                | serpin peptidase inhibitor, clade A (alpha-1 antitrypsin, antitrypsin), member 3          | 1.892            |
| NR1D2     | —                                                                       | 3.3            | TAC63                   | tachykinin receptor 3                                                                     | 1.874            |
| REV1      | REV1, polymerase (DNA directed)                                         | 3.1            | FAM69A                  | family with sequence similarity 69, member A                                              | 1.871            |
| ADIPOQ    | adiponectin, C11a and collagen domain containing                        | 3.1            | ARHGAP29                | Rho GTPase activating protein 29                                                          | 1.866            |
| PER3      | period circadian clock 3                                                | 3.1            | C4orf32                 | chromosome 4 open reading frame 32                                                        | 1.862            |
| PIM3      | pim-3 oncogene                                                          | 3.1            | LTB                     | lymphotoxin beta (TNF superfamily, member 3)                                              | 1.862            |
| ERF11     | ERBB receptor feedback inhibitor 1                                      | 3.1            | Ces1d                   | carboxylesterase 1D                                                                       | 1.860            |
| block 2   | palliovirus receptor                                                    | 3.0            | PSMB8                   | proteasome (prosome, macropain) subunit, beta type, 8                                     | 1.853            |
| PIP       | BIG family, member 2                                                    | 2.9            | TMEM176A                | transmembrane protein 176A                                                                | 1.839            |
| CCNG1     | prolactin-induced protein                                               | 2.8            | PIK3CG                  | phosphatidylinositol-4,5-bisphosphate 3-kinase, catalytic subunit gamma                   | 1.825            |
| DVRK3     | cyclin G1                                                               | 2.8            | MA11                    | N-acetyltransferase 1 (arylamine N-acetyltransferase)                                     | 1.815            |
| PHLDA3    | dual-specificity tyrosine-(Y)-phosphorylation regulated kinase 3        | 2.8            | CIRBP                   | cold inducible RNA binding protein                                                        | 1.815            |
| JUNB      | pleckstrin homology-like domain, family A, member 3                     | 2.7            | Aco11                   | acyl-CoA thioesterase 1                                                                   | 1.809            |
| IER2      | Jun B proto-oncogene                                                    | 2.7            | SCD                     | stearoyl-CoA desaturase (delta-9-desaturase)                                              | 1.804            |
| AEN       | immediate early response 2                                              | 2.7            | SERPINB9                | serpin peptidase inhibitor, clade B (ovalbumin), member 9                                 | 1.796            |
| RNASE3    | apoptosis enhancing nuclease                                            | 2.6            | Gbp2                    | guanylate binding protein 2                                                               | 1.794            |
| SLC19A2   | solute carrier family 19 (thiamine transporter), member 2               | 2.6            | SLC13A2                 | solute carrier family 13 (sodium-dependent dicarboxylate transporter), member 2           | 1.788            |
| IER3      | immediate early response 3                                              | 2.5            | 503343015Rk             | RIKEN cDNA 503343015 gene                                                                 | 1.778            |
| DUSP8     | dual specificity phosphatase 8                                          | 2.5            | TNFSF13B                | tumor necrosis factor (ligand) superfamily, member 13b                                    | 1.775            |
| UBE2C     | ubiquitin-conjugating enzyme E2C                                        | 2.5            | FAM38                   | family with sequence similarity 3, member B                                               | 1.772            |
| KDM6B     | lysine (K)-specific demethylase 6B                                      | 2.5            | ARHGEF37                | Rho guanine nucleotide exchange factor (GEF) 37                                           | 1.770            |
| ZAK       | sterile alpha motif and leucine zipper containing kinase AZK            | 2.4            | HLA-C                   | major histocompatibility complex, class I, C                                              | 1.765            |
| KLF4      | Kruppel-like factor 4 (gut)                                             | 2.4            | Serpindb                | serine (or cysteine) peptidase inhibitor, clade B, member db                              | 1.753            |
| NR1D1     | nuclear receptor subfamily 1, group D, member 1                         | 2.4            | MALP1                   | nucleic acid binding protein 1                                                            | 1.751            |
| DUSP5     | dual specificity phosphatase 5                                          | 2.4            | SERTA4                  | SERTA domain containing 4                                                                 | 1.747            |
| THRSP     | thyroid hormone responsive                                              | 2.4            | YPEL2                   | yippeee-like 2 (Drosophila)                                                               | 1.747            |
| BHLHE40   | basic helix-loop-helix family, member e40                               | 2.4            | LDB3                    | —                                                                                         | 1.747            |
| DDIT3     | DNA-damage-inducible transcript 3                                       | 2.4            | ACTR8                   | APR6 actin-related protein 6 homolog (yeast)                                              | 1.742            |
| MK167     | antigen identified by monoclonal antibody Kl-67                         | 2.4            | TRDM11                  | RNA aspartic acid methyltransferase 1                                                     | 1.740            |
| ZFP36     | ZFP36 ring finger protein                                               | 2.3            | TJF3                    | —                                                                                         | 1.734            |
| EXOC4     | exocyst complex component 4                                             | 2.3            | Csprs (includes others) | —                                                                                         | 1.725            |
| GPCPD1    | glycerophosphocholine phosphodiesterase GDE1 homolog (S. cerevisiae)    | 2.3            | LY6G6D                  | solute carrier family 16, member 6                                                        | 1.722            |
| RET       | ret proto-oncogene                                                      | 2.3            | HIST1HC                 | lymphocyte antigen 6 complex, locus GdD                                                   | 1.721            |
| CD83      | CD83 molecule                                                           | 2.3            | BID                     | Bcl3 interacting domain death agonist                                                     | 1.718            |
| PPRC1     | peroxisome proliferator-activated receptor gamma, coactivator-related 1 | 2.3            | HLA-B                   | —                                                                                         | 1.717            |
| C6orf4    | chromosome 6 open reading frame 4                                       | 2.2            | PDP1                    | pyruvate dehydrogenase phosphatase catalytic subunit 1                                    | 1.712            |
| PTRA1     | protein tyrosine phosphatase type IVA, member 1                         | 2.2            | CLN8                    | ceroid-lipofuscinosis, neuronal 8 (epilepsy, progressive with mental retardation)         | 1.709            |
| TMEM44    | transmembrane protein 44                                                | 2.2            | TCTA                    | T-cell leukemia translocation altered                                                     | 1.703            |

Continued on next page

## Supplementary Table S2. Continued.

| Symbol        | Gene name                                                                                                                                                 | Fold change up | Symbol                   | Gene name                                                                                          | Fold change down |
|---------------|-----------------------------------------------------------------------------------------------------------------------------------------------------------|----------------|--------------------------|----------------------------------------------------------------------------------------------------|------------------|
| ZMAT3         | zinc finger, matrix-type 3                                                                                                                                | 2.2            | UCMA                     | upper zone of growth plate and cartilage matrix associated                                         | 1.702            |
| Lyz1/Lyz2     | lysozyme 2                                                                                                                                                | 2.2            | 4930M14L22%K             | RIKEN cDNA_4930M14L22 gene                                                                         | 1.702            |
| C1orf82       | chromosome 11 open reading frame 82                                                                                                                       | 2.2            | Kcrl1/2b                 | potassium channel tetramerisation domain containing 12b                                            | 1.701            |
| CEN62         | cyclin B2                                                                                                                                                 | 2.1            | LEO1                     | Leo 1, Polr1/RNA polymerase II complex component, homolog (S. cerevisiae)                          | 1.701            |
| PRAKGC1A      | peroxisome proliferator-activated receptor gamma, coactivator 1 alpha nuclear factor of kappa light polypeptide gene enhancer in B-cells inhibitor, alpha | 2.1            | MPLKIP                   | M-phase specific PLK1 interacting protein                                                          | 1.695            |
| NKB1A         | nuclear factor of kappa light polypeptide gene enhancer in B-cells inhibitor, alpha                                                                       | 2.1            | NKG7                     | natural killer cell group 7 sequence                                                               | 1.691            |
| NRAA1         | nuclear receptor subfamily 4, group A, member 1                                                                                                           | 2.1            | DLEU7                    | deleted in lymphocytic leukemia, 7                                                                 | 1.686            |
| PPP1R10       | protein phosphatase 1, regulatory subunit 10                                                                                                              | 2.1            | TMEM176B                 | transmembrane protein 176B                                                                         | 1.678            |
| HSPA1A/HSPA1B | heat shock 70kDa protein 1A                                                                                                                               | 2.1            | SYTL3                    | synaptotagmin-like 3                                                                               | 1.676            |
| FAM46B        | family with sequence similarity 46, member B                                                                                                              | 2.1            | ADAMTS15                 | ADAM metallopeptidase with thrombospondin type 1 motif, 15                                         | 1.662            |
| TP53NP1       | tumor protein p53 inducible nuclear protein 1                                                                                                             | 2.1            | Zfp229/Zfp740            | zinc finger protein 740                                                                            | 1.661            |
| C14orf159     | chromosome 14 open reading frame 159                                                                                                                      | 2.0            | AWT12010                 | expressed sequence AW112010                                                                        | 1.654            |
| SESN2         | sesfin 2                                                                                                                                                  | 2.0            | CHMP2B                   | charged multivesicular body protein 2B                                                             | 1.652            |
| LOXRF1        | LOX peptidease N-terminal domain and ring finger 1                                                                                                        | 2.0            | CIU                      | —                                                                                                  | 1.651            |
| SERPINE2      | serpin peptidase inhibitor, clade E (nexin, plasminogen activator inhibitor type 1), member 2                                                             | 2.0            | SNX16                    | sorting nexin 16                                                                                   | 1.646            |
| MOB3B         | MOB kinase activator 3B                                                                                                                                   | 2.0            | GULP1                    | GULP engulfment adaptor PTB domain containing 1                                                    | 1.644            |
| ABCC9         | ATP-binding cassette, sub-family C (CFR/MRP), member 9                                                                                                    | 2.0            | Gstf3                    | glutathione S-transferase, theta 3                                                                 | 1.639            |
| TSAPM4        | tetraspanin 4                                                                                                                                             | 2.0            | RORC                     | —                                                                                                  | 1.636            |
| DNAJB4        | DnaJ (Hsp40) homolog, subfamily B, member 4                                                                                                               | 2.0            | INHBB                    | inhibin, beta B                                                                                    | 1.630            |
| KLF9          | Kruppel-like factor 9                                                                                                                                     | 2.0            | ESRRG                    | estrogen-related receptor gamma                                                                    | 1.627            |
| TOP2A         | topoisomerase (DNA) II alpha 170kDa                                                                                                                       | 2.0            | PDGFRB                   | platelet-derived growth factor receptor, beta polypeptide                                          | 1.627            |
| TOB2          | transducer of ERBB2, 2                                                                                                                                    | 2.0            | TMEM54                   | transmembrane protein 54                                                                           | 1.623            |
| KPNA2         | karyopherin alpha 2 (RAG cohort 1, importin alpha 1)                                                                                                      | 2.0            | RAB7L1                   | —                                                                                                  | 1.622            |
| SERPINE1      | serpin peptidase inhibitor, clade E (nexin, plasminogen activator inhibitor type 1), member 1                                                             | 1.9            | VEGFC                    | vascular endothelial growth factor C                                                               | 1.621            |
| TSC22D3       | TSC22 domain family, member 3                                                                                                                             | 1.9            | RRH                      | retinal pigment epithelium-derived rhodopsin homolog                                               | 1.614            |
| LMCD1         | LIM and cysteine-rich domains 1                                                                                                                           | 1.9            | Zfp932 (includes others) | zinc finger protein 932                                                                            | 1.611            |
| DCXR          | —                                                                                                                                                         | 1.9            | TIPA                     | tocopherol (alpha) transfer protein                                                                | 1.604            |
| SLC7A1        | solute carrier family 7 (cationic amino acid transporter, y+ system), member 1                                                                            | 1.9            | LYRM2                    | LYR motif containing 2                                                                             | 1.603            |
| RAPH1         | Ras association (RalGDS/AF-6) and pleckstrin homology domains 1                                                                                           | 1.9            | DNAJC12                  | DnaJ (Hsp40) homolog, subfamily C, member 12                                                       | 1.597            |
| LPIN1         | lipin 1                                                                                                                                                   | 1.9            | Igk                      | immunoglobulin kappa chain complex                                                                 | 1.592            |
| RMF39         | ring finger protein 39                                                                                                                                    | 1.9            | FMO2                     | flavin containing monooxygenase 2 (non-functional)                                                 | 1.590            |
| KLF10         | Kruppel-like factor 10                                                                                                                                    | 1.9            | GAUNT12                  | UDP-N-acetyl-alpha-D-galactosamine:poly(epsilon)-N-acetylgalactosaminyltransferase 12 (GalNAc-T12) | 1.590            |
| HERPUD1       | homocysteine-inducible, endoplasmic reticulum stress-inducible, ubiquitin-like domain member 1                                                            | 1.9            | C2orf72                  | chromosome 2 open reading frame 72                                                                 | 1.589            |
| TSC22D2       | TSC22 domain family, member 2                                                                                                                             | 1.9            | METTL20                  | methyltransferase like 20                                                                          | 1.589            |
| CAMKK1        | calcium/calmodulin-dependent protein kinase kinase 1, alpha                                                                                               | 1.9            | ABHD17C                  | abhydrolase domain containing 17C                                                                  | 1.586            |
| C1orf51       | chromosome 1 open reading frame 51                                                                                                                        | 1.9            | RNF144B                  | ring finger protein 144B                                                                           | 1.584            |
| KAA1737       | KAA1737                                                                                                                                                   | 1.9            | PPH1                     | peptidylprolyl isomerase H (cyclophilin H)                                                         | 1.583            |
| BAX           | BCL2-associated X protein                                                                                                                                 | 1.8            | GSTZ3C (includes others) | —                                                                                                  | 1.579            |
| CRY2          | cryptochrome 2 (photolyase-like)                                                                                                                          | 1.8            | GSTT13                   | histone cluster 2, H3c                                                                             | 1.577            |
| JDP2          | Jun dimerization protein 2                                                                                                                                | 1.8            | VAV2                     | carbohydrate (chondroitin 4) sulfotransferase 13 vav 2, guanine nucleotide exchange factor         | 1.575            |
| AUTS2         | —                                                                                                                                                         | 1.8            | RHBDL2                   | rhomboid, vein-like 2 (Drosophila)                                                                 | 1.574            |
| MMP12         | matrix metalloproteinase 12 (macrophage elastase)                                                                                                         | 1.8            | PM1M1                    | phosphomannomutase 1                                                                               | 1.574            |
| CXCL2         | chemokine (C-X-C motif) ligand 2                                                                                                                          | 1.8            | RAMP1                    | receptor (G protein-coupled) activity modifying protein 1                                          | 1.570            |
| CHKA          | choline kinase alpha                                                                                                                                      | 1.8            | RNF25                    | —                                                                                                  | 1.569            |
| VWA8          | von Willebrand factor A domain containing 8                                                                                                               | 1.8            | ETAA1                    | Ewing tumor-associated antigen 1                                                                   | 1.568            |
| JUND          | Jun D proto-oncogene                                                                                                                                      | 1.8            | UBD                      | ubiquitin D                                                                                        | 1.568            |
| CSRP1         | cysteine-serine-rich nuclear protein 1                                                                                                                    | 1.8            | NCN1                     | nicotin 1                                                                                          | 1.566            |
| FAP           | fibroblast activation protein, alpha                                                                                                                      | 1.8            | SLC15A2                  | solute carrier family 15 (oligopeptide transporter), member 2                                      | 1.565            |
| NDN           | necln, melanoma antigen (MAGEB) family member                                                                                                             | 1.8            | LBFI1                    | ligand dependent nuclear receptor interacting factor 1                                             | 1.563            |
| SLC7A5        | solute carrier family 7 (amino acid transporter light chain, L system), member 5                                                                          | 1.8            | TIAB1                    | TGF-beta activated kinase 1/NAP3K7 binding protein 2                                               | 1.563            |
| PPP1R15A      | protein phosphatase 1, regulatory subunit 15A                                                                                                             | 1.8            | CRVM                     | —                                                                                                  | 1.563            |
| LAMA3         | laminin, alpha 3                                                                                                                                          | 1.8            | XXNL2                    | nucleoredoxin-like 2                                                                               | 1.562            |
| C15orf39      | chromosome 15 open reading frame 39                                                                                                                       | 1.8            | MTERF                    | mitochondrial transcription termination factor                                                     | 1.562            |
| TNFAIP6       | peptidase M20 domain containing 1                                                                                                                         | 1.8            | TSAN8                    | tetraspanin 8                                                                                      | 1.558            |
| PM2D1         | Kruppel-like factor 13                                                                                                                                    | 1.8            | MAP3K1                   | mitogen-activated protein kinase kinase kinase 1, E3 ubiquitin protein ligase                      | 1.558            |
| KLF13         | Kruppel-like factor 13                                                                                                                                    | 1.8            | NMI                      | N-myc (and STAT) interactor                                                                        | 1.556            |
| TSAN6         | tetraspanin 6                                                                                                                                             | 1.8            | RPA3                     | replication protein A3, 14kDa                                                                      | 1.556            |
| FN1           | fibronectin 1                                                                                                                                             | 1.7            | RARB                     | retinoic acid receptor, beta                                                                       | 1.555            |
| SULF2         | sulfatase 2                                                                                                                                               | 1.7            | ITIC3DA                  | tetranitropeptide repeat domain, 30A                                                               | 1.555            |
| SLC20A1       | solute carrier family 20 (phosphate transporter), member 1                                                                                                | 1.7            | GIPBP3                   | GIP binding protein 3 (mitochondrial)                                                              | 1.548            |
| CIFED4        | Cbp/p300-interacting transcription factor, with Glu/Asp-rich carboxy-terminal domain, 4                                                                   | 1.7            | KRT79                    | keratin 79                                                                                         | 1.548            |
| TREB3         | tribbles homolog 3 (Drosophila)                                                                                                                           | 1.7            | MYCL                     | zinc finger protein 329                                                                            | 1.543            |
| PTRT          | —                                                                                                                                                         | 1.7            | RASSF6                   | Ras association (RalGDS/AF-6) domain family member 6                                               | 1.541            |
| PLK2          | polo-like kinase 2                                                                                                                                        | 1.7            | RANF3                    | PCAN family member 3                                                                               | 1.541            |
| NOTCH1        | notch 1                                                                                                                                                   | 1.7            | RCAN3                    | PCAN family member 3                                                                               | 1.541            |
| BAZ1A         | bromodomain adjacent to zinc finger domain, 1A                                                                                                            | 1.7            | ZNF157                   | zinc finger protein 157                                                                            | 1.540            |

Continued on next page

Supplementary Table S2. Continued.

| Symbol       | Gene name                                                                             | Fold change up | Symbol    | Gene name                                                                                                                     | Fold change down |
|--------------|---------------------------------------------------------------------------------------|----------------|-----------|-------------------------------------------------------------------------------------------------------------------------------|------------------|
| PRRC4        | proline rich Gln (G-carboxyglutamic acid) 4 (transmembrane)                           | 1.7            | ZDHHC2    | zinc finger, DHH-type containing 2                                                                                            | 1.540            |
| IFO2         | intermediates filament family orphan 2                                                | 1.7            | ID1       | isopentenyl-alpha-phosphate delta isomerase 1                                                                                 | 1.539            |
| PBK          | PDZ binding kinase                                                                    | 1.7            | PK3R1     | phosphoinositide-3-kinase, regulatory subunit 1 (alpha)                                                                       | 1.538            |
| WN14         | wingless-type MMTV integration site family, member 4                                  | 1.7            | CXCL14    | chemokine (C-X-C motif) ligand 14                                                                                             | 1.538            |
| TRIB1        | tribbles homolog 1 (Drosophila)                                                       | 1.7            | SUMO3     | small ubiquitin-like modifier 3                                                                                               | 1.537            |
| ATF4         | activating transcription factor 4                                                     | 1.7            | GN34      | —                                                                                                                             | 1.534            |
| AK4          | adenylate kinase 4                                                                    | 1.7            | STR24     | serine/threonine kinase 24                                                                                                    | 1.534            |
| PDE4DIP      | phosphodiesterase 4D interacting protein                                              | 1.7            | FFA12     | free fatty acid receptor 2                                                                                                    | 1.533            |
| SLC23A2      | solute carrier family 23 (ascorbic acid transporter), member 2                        | 1.7            | MAN1C1    | mannoosidase, alpha, class 1C, member 1                                                                                       | 1.532            |
| DDIT4        | DNA-damage-inducible transcript 4                                                     | 1.7            | GPHN      | gephyrin                                                                                                                      | 1.527            |
| CDR2         | cerebellar degeneration-related protein 2, 62kDa                                      | 1.7            | Ces1e     | carboxylesterase 1E                                                                                                           | 1.527            |
| RNF169       | ring finger protein 169                                                               | 1.7            | CYB5R1    | cytochrome b5 reductase 1                                                                                                     | 1.526            |
| AB1B2        | ankyrin repeat and BTB (POZ) domain containing 2                                      | 1.7            | CACFD1    | calcium channel flower domain containing 1                                                                                    | 1.526            |
| WEE1         | WEE1 homolog (S. pombe)                                                               | 1.7            | POLB      | polymerase (DNA directed), beta                                                                                               | 1.525            |
| GD10         | growth differentiation factor 10                                                      | 1.7            | MRPL27    | mitochondrial ribosomal protein L27                                                                                           | 1.525            |
| CDC8C86      | colled-coil domain containing 86                                                      | 1.7            | TMEM128   | transmembrane protein 128                                                                                                     | 1.525            |
| ZNF597       | zinc finger protein 597                                                               | 1.7            | CA8       | carbonic anhydrase VIII                                                                                                       | 1.523            |
| AZIN1        | antizyme inhibitor 1                                                                  | 1.7            | C9orf52   | chromosome 9 open reading frame 152                                                                                           | 1.522            |
| MCL1         | myeloid cell leukemia sequence 1 (BCL2-related)                                       | 1.7            | ABO       | ABO blood group, (transferase A, alpha 1, 3-N-acetylglucosaminyltransferase, transferase B, alpha 1, 3-galactosyltransferase) | 1.522            |
| MDM2         | MDM2 oncogene, E3 ubiquitin protein ligase                                            | 1.7            | PML       | promyelocytic leukemia                                                                                                        | 1.521            |
| TXNP1        | thioredoxin interacting protein                                                       | 1.7            | ALKBH7    | alkB, alkylation repair homolog 7 (E. coli)                                                                                   | 1.520            |
| PDE7A        | phosphodiesterase 7A                                                                  | 1.7            | MFS99     | major facilitator superfamily domain containing 9                                                                             | 1.520            |
| IGFBP5       | insulin-like growth factor binding protein 5                                          | 1.7            | TUBA4A    | tubulin, alpha 4a                                                                                                             | 1.518            |
| Ccnb1/Gmt593 | cyclin B1                                                                             | 1.7            | METL10    | methyltransferase like 10                                                                                                     | 1.518            |
| NOLC1        | nucleolar and coiled-body phosphoprotein 1                                            | 1.6            | NX2       | nuclear transport factor 2-like export factor 2                                                                               | 1.513            |
| ZNF319       | zinc finger protein 319                                                               | 1.6            | C3orf33   | chromosome 3 open reading frame 33                                                                                            | 1.513            |
| KIF21A       | kinesin family member 21A                                                             | 1.6            | MTERF3    | MTERF domain containing 3                                                                                                     | 1.509            |
| 311000122Rk  | RIKEN cDNA 311000122 gene                                                             | 1.6            | TTC308    | tetratricopeptide repeat domain 308                                                                                           | 1.508            |
| PCF11        | PCF11 cleavage and polyadenylation factor subunit                                     | 1.6            | TCEANC    | transcription elongation factor A (SII) N-terminal and central domain containing                                              | 1.508            |
| CDC42BP6     | CDC42 binding protein kinase gamma (DMPK-like)                                        | 1.6            | PPM1K     | protein phosphatase, Mg2+/Mn2+ dependent, 1K                                                                                  | 1.507            |
| ANGPT12      | angiotensin-like 2                                                                    | 1.6            | TRIGK     | triple QxxK/R motif containing                                                                                                | 1.507            |
| CENL1        | cyclin L1                                                                             | 1.6            | CD27      | CD27 molecule                                                                                                                 | 1.507            |
| SLC38A2      | solute carrier family 38, member 2                                                    | 1.6            | TMM21     | translocase of inner mitochondrial membrane 21 homolog (yeast)                                                                | 1.503            |
| T0B1         | transducer of ERBB2, 1                                                                | 1.6            | RAPGEF5   | Rap guanine nucleotide exchange factor (GEP) 5                                                                                | 1.503            |
| WAK2         | WAK (lysine deficient) protein kinase 2                                               | 1.6            | SHC1      | SHC (Src homology 2 domain containing) transforming protein 1                                                                 | 1.503            |
| USP54        | ubiquitin specific peptidase 54                                                       | 1.6            | ORMDL1    | ORMDL-like 1 (S. cerevisiae)                                                                                                  | 1.502            |
| DUSP3        | dual specificity phosphatase 3                                                        | 1.6            | Serpind1b | serpine (or cysteine) peptidase inhibitor, clade B, member 1b                                                                 | 1.501            |
| RSAD1        | radical S-adenosylmethionine domain containing 1                                      | 1.6            |           |                                                                                                                               |                  |
| MGA14A       | mammals (alpha-1, 3)-glycoprotein beta-1,4-N-acetylglucosaminyltransferase, isozyme A | 1.6            |           |                                                                                                                               |                  |
| C030046G05   | uncharacterized protein C030046G05                                                    | 1.6            |           |                                                                                                                               |                  |
| CARS         | cysteine/HRNA synthetase                                                              | 1.6            |           |                                                                                                                               |                  |
| DGKG         | diacylglycerol kinase, gamma 90kDa                                                    | 1.6            |           |                                                                                                                               |                  |
| ISM1         | isfamin 1, angiogenesis inhibitor                                                     | 1.6            |           |                                                                                                                               |                  |
| PGSTN        | perostin, osteoblast specific factor                                                  | 1.6            |           |                                                                                                                               |                  |
| ENPDP7       | ectonucleoside triphosphate diphosphohydrolase 7                                      | 1.6            |           |                                                                                                                               |                  |
| FAM212B      | family with sequence similarity 212, member B                                         | 1.6            |           |                                                                                                                               |                  |
| C11orf24     | chromosome 11 open reading frame 24                                                   | 1.6            |           |                                                                                                                               |                  |
| ENC1         | ectodermal-neural cortex 1 (with BTB domain)                                          | 1.6            |           |                                                                                                                               |                  |
| YOD1         | YOD1 deubiquitinase                                                                   | 1.6            |           |                                                                                                                               |                  |
| C6H          | cytokine inducible SH2-containing protein                                             | 1.6            |           |                                                                                                                               |                  |
| CCNA2        | cyclin A2                                                                             | 1.6            |           |                                                                                                                               |                  |
| LNK1         | ligand of numb-protein X 1, E3 ubiquitin protein ligase                               | 1.6            |           |                                                                                                                               |                  |
| ZNF281       | zinc finger protein 281                                                               | 1.6            |           |                                                                                                                               |                  |
| FMOD         | left-right determination factor 1                                                     | 1.6            |           |                                                                                                                               |                  |
| NCAPH        | fibromodulin                                                                          | 1.6            |           |                                                                                                                               |                  |
| ANKRD12      | ankyrin repeat domain 12                                                              | 1.6            |           |                                                                                                                               |                  |
| NCAPH        | —                                                                                     | 1.6            |           |                                                                                                                               |                  |
| LIF          | lactotransferin                                                                       | 1.6            |           |                                                                                                                               |                  |
| STOX2        | starchless box 2                                                                      | 1.6            |           |                                                                                                                               |                  |
| EIF2D        | eukaryotic translation initiation factor 2D                                           | 1.6            |           |                                                                                                                               |                  |
| PPAT         | phosphatidyl pyrophosphate amidotransferase                                           | 1.6            |           |                                                                                                                               |                  |
| MBP          | myelin basic protein                                                                  | 1.6            |           |                                                                                                                               |                  |
| GNL3         | guanine nucleotide binding protein-like 3 (nucleolar)                                 | 1.6            |           |                                                                                                                               |                  |
| PC           | pyruvate carboxylase                                                                  | 1.6            |           |                                                                                                                               |                  |
| POLK         | polymerase (DNA directed) kappa                                                       | 1.6            |           |                                                                                                                               |                  |
| LIF          | leukemia inhibitory factor                                                            | 1.6            |           |                                                                                                                               |                  |
| PDE12        | phosphodiesterase 12                                                                  | 1.5            |           |                                                                                                                               |                  |
| TF           | transferrin                                                                           | 1.5            |           |                                                                                                                               |                  |
| CDK1         | cyclin-dependent kinase 1                                                             | 1.5            |           |                                                                                                                               |                  |

Continued on next page

Supplementary Table S2. Continued.

| Symbol   | Gene name                                                                                   | Symbol | Fold change up | Gene name | Fold change down |
|----------|---------------------------------------------------------------------------------------------|--------|----------------|-----------|------------------|
| ZNF131   | zinc finger protein 131                                                                     |        | 1.5            |           |                  |
| CD300A   | CD300a molecule                                                                             |        | 1.5            |           |                  |
| NFE2L2   | nuclear factor, erythroid 2-like 2                                                          |        | 1.5            |           |                  |
| RHOB     | ras homolog family member B                                                                 |        | 1.5            |           |                  |
| STMN1    | stathmin 1                                                                                  |        | 1.5            |           |                  |
| ZBTB21   | zinc finger and BTB domain containing 21                                                    |        | 1.5            |           |                  |
| TNC      | —                                                                                           |        | 1.5            |           |                  |
| HK2      | hexokinase 2                                                                                |        | 1.5            |           |                  |
| FRY      | fury homolog (Drosophila)                                                                   |        | 1.5            |           |                  |
| GRIA3    | glutamate receptor, ionotropic, AMPA 3                                                      |        | 1.5            |           |                  |
| KIF1B    | kinesin family member 1B                                                                    |        | 1.5            |           |                  |
| CDC20    | cell division cycle 20                                                                      |        | 1.5            |           |                  |
| SEMA3D   | sema domain, immunoglobulin domain (Ig), short basic domain, secreted, (semaphorin) 3D      |        | 1.5            |           |                  |
| ZBTB2    | zinc finger and BTB domain containing 2                                                     |        | 1.5            |           |                  |
| TCFL5    | transcription factor-like 5 (basic helix-loop-helix)                                        |        | 1.5            |           |                  |
| CENPA    | centromere protein A                                                                        |        | 1.5            |           |                  |
| GALNT6   | UDP-N-acetyl-alpha-D-galactosamine polypeptide N-acetylglucosaminyltransferase 6 (GalNAc-6) |        | 1.5            |           |                  |
| BACH2    | BTB and CNC homology 1, basic leucine zipper transcription factor 2                         |        | 1.5            |           |                  |
| AGT      | angiotensinogen (serpin peptidase inhibitor, class A, member 8)                             |        | 1.5            |           |                  |
| KLF7     | —                                                                                           |        | 1.5            |           |                  |
| SYNPO    | synaptopodin                                                                                |        | 1.5            |           |                  |
| MYH11    | myosin, heavy chain 11, smooth muscle                                                       |        | 1.5            |           |                  |
| ACTG2    | actin, gamma 2, smooth muscle, enteric                                                      |        | 1.5            |           |                  |
| COL4A5   | collagen, type IV, alpha 5                                                                  |        | 1.5            |           |                  |
| ZFH3     | zinc finger homeobox 3                                                                      |        | 1.5            |           |                  |
| PLCXD2   | phosphatidylinositol-specific phospholipase C, X domain containing 2                        |        | 1.5            |           |                  |
| RBBP6    | refinoblastoma binding protein 6                                                            |        | 1.5            |           |                  |
| DDX21    | DEAD (Asp-Glu-Ala-Asp) box helicase 21                                                      |        | 1.5            |           |                  |
| PLAUR    | plasminogen activator, urokinase receptor                                                   |        | 1.5            |           |                  |
| AAAS     | achalasia, adrenergic insufficiency, alacrimia                                              |        | 1.5            |           |                  |
| BRWD1    | bromodomain and WD repeat domain containing 1                                               |        | 1.5            |           |                  |
| NRG2     | neuregulin 2                                                                                |        | 1.5            |           |                  |
| SLC5A3   | solute carrier family 5 (sodium/myo-inositol cotransporter), member 3                       |        | 1.5            |           |                  |
| CDC42EP1 | CDC42 effector protein (Rho GTPase binding) 1                                               |        | 1.5            |           |                  |
| DDX3X    | —                                                                                           |        | 1.5            |           |                  |
| RIPK4    | receptor-interacting serine-threonine kinase 4                                              |        | 1.5            |           |                  |
| CPT1A    | carnitine palmitoyltransferase 1A (liver)                                                   |        | 1.5            |           |                  |
| NUP90    | nucleoporin 90kDa                                                                           |        | 1.5            |           |                  |
| TTC25    | tetratricopeptide repeat domain 25                                                          |        | 1.5            |           |                  |
| TP63     | tumor protein p63                                                                           |        | 1.5            |           |                  |
| IGFBP2   | insulin-like growth factor 2, receptor                                                      |        | 1.5            |           |                  |
| YTHDF1   | YTH domain family, member 1                                                                 |        | 1.5            |           |                  |
| ATXN2    | ataxin 2                                                                                    |        | 1.5            |           |                  |

Supplementary Table S3. HBOT vs. control.

| Symbol        | Gene name                                                                                              | Fold change up | Symbol                   | Gene name                                                                                             | Fold change down |
|---------------|--------------------------------------------------------------------------------------------------------|----------------|--------------------------|-------------------------------------------------------------------------------------------------------|------------------|
| CHAC1         | ChoC, cation transport regulator homolog 1 (E. coli)                                                   | 13.19573678    | SLC13A3                  | solute carrier family 13 (sodium-dependent dicarboxylate transporter), member 3                       | 7.862564788      |
| TRB3          | trifolins homolog 3 (Drosophila)                                                                       | 6.854255638    | SA42                     | —                                                                                                     | 5.704102869      |
| DBP           | D site of albumin promoter (albumin D-box) binding protein                                             | 6.399882008    | DUSP1                    | dual specificity phosphatase 1                                                                        | 5.168829401      |
| PSAT1         | phosphoserine aminotransferase 1                                                                       | 6.117745112    | CH1A                     | chitinase, acidic                                                                                     | 5.059518169      |
| MTHFD2        | methylene tetrahydrofolate dehydrogenase (NADP+ dependent) 2, methylenetetrahydrofolate cyclohydrolase | 5.084126757    | CXCL13                   | chemokine (C-X-C motif) ligand 13                                                                     | 4.518988858      |
| PD4K          | pyruvate dehydrogenase kinase, isozyme 4                                                               | 4.633171225    | MSA6A                    | membrane-spanning 4-domains, subfamily A, member 6A                                                   | 4.187241128      |
| ATF5          | activating transcription factor 5                                                                      | 3.458148925    | ALF1                     | allograft inflammatory factor 1                                                                       | 3.991690876      |
| RNASE1        | ribonuclease, RNase A family, 1 (pancreatic)                                                           | 3.067365319    | Tgfb1/Tgfp2              | T cell specific GTPase 1                                                                              | 3.82378127       |
| PCK2          | phosphoenolpyruvate carboxykinase 2 (mitochondrial)                                                    | 2.983488053    | AMY1A (includes others)  | amylase, alpha 1A (salivary)                                                                          | 3.805273105      |
| SLC3A2        | solute carrier family 3 (amino acid transporter heavy chain), member 2                                 | 2.946538435    | CD52                     | —                                                                                                     | 3.602503919      |
| RACS          | arginyl-HRNA synthetase                                                                                | 2.828427125    | BC12A1                   | BC12-related protein A1                                                                               | 3.575140649      |
| DUSP4         | dual specificity phosphatase 4                                                                         | 2.777910272    | Fcrl6                    | Fc receptor-like 5, scavenger receptor                                                                | 3.535710124      |
| PHGDH         | phosphoglycerate dehydrogenase                                                                         | 2.646342888    | Igvl1                    | immunoglobulin lambda variable 1                                                                      | 3.506422885      |
| Acot1         | acyl-CoA thioesterase 1                                                                                | 2.602683711    | HCK                      | hemopoietic cell kinase                                                                               | 3.484616769      |
| SHMT2         | serine hydroxymethyltransferase 2 (mitochondrial)                                                      | 2.503592917    | APOF                     | apolipoprotein F                                                                                      | 3.410639567      |
| SLC7A1        | solute carrier family 7 (cationic amino acid transporter, y+ system), member 1                         | 2.4794154      | Igfbp1                   | interleukin inducible GTPase 1                                                                        | 3.370687318      |
| TLL1          | toll-like 1                                                                                            | 2.470837274    | CRP3                     | cysteine-rich secretory protein 3                                                                     | 3.361255009      |
| PK3BP1        | phosphoinositide-3-kinase interacting protein 1                                                        | 2.438510188    | LCN2                     | lipocalin 2                                                                                           | 3.233283475      |
| GF15          | growth differentiation factor 15                                                                       | 2.368543224    | Clec4e3                  | C-type lectin domain family 4, member a3                                                              | 3.188336392      |
| SLC7A5        | solute carrier family 7 (amino acid transporter light chain, L system), member 5                       | 2.335934789    | Scd2                     | stearyl-Coenzyme A desaturase 2                                                                       | 3.116658319      |
| IARS          | isolectin-B4 binding protein 1                                                                         | 2.334316204    | CCL8                     | —                                                                                                     | 3.097276111      |
| DDIT4         | DNA-damage-inducible transcript 4                                                                      | 2.33269874     | IGHM                     | immunoglobulin heavy constant mu                                                                      | 3.071620539      |
| COL11A1       | collagen, type XI, alpha 1                                                                             | 2.324628215    | FOS                      | FBJ murine osteosarcoma viral oncogene homolog                                                        | 3.031433133      |
| CARS          | cysteinyl-HRNA synthetase                                                                              | 2.292624371    | CD72                     | CD72 molecule                                                                                         | 3.020946171      |
| SLC22A4       | solute carrier family 22 (organic cation/zwitterion transporter), member 4                             | 2.239225777    | IFI44                    | interferon-induced protein 44                                                                         | 3.004239854      |
| GRB10         | growth factor receptor-bound protein 10                                                                | 2.205338326    | M64d4b                   | membrane-spanning 4-domains, subfamily A, member 6B                                                   | 2.969604741      |
| BCL6          | B-cell CLL/lymphoma 6                                                                                  | 2.200757219    | PRKCB                    | protein kinase C, beta                                                                                | 2.918040688      |
| IFRD1         | —                                                                                                      | 2.184041091    | IK3001Z016R1K/IK13       | —                                                                                                     | 2.869899069      |
| MA6RS         | methionyl-HRNA synthetase                                                                              | 2.162949527    | DDX60                    | DEAD (Asp-Glu-Ala-Asp) box polypeptide 60                                                             | 2.865923301      |
| LSS           | lanosterol synthase (2,3-oxidosqualene-lanosterol cyclase)                                             | 2.140577397    | CLEC4A                   | C-type lectin domain family 4, member A                                                               | 2.838246712      |
| UBR2          | ubiquitin protein ligase E3 component n1-recogin1.2                                                    | 2.140577397    | CS16                     | cystatin D                                                                                            | 2.834314793      |
| DDIT3         | DNA-damage-inducible transcript 3                                                                      | 2.139094176    | ITGAL                    | integrin, alpha L (antigen CD11A (p180), lymphocyte function-associated antigen 1; alpha polypeptide) | 2.824508809      |
| FBXO31        | F-box protein 31                                                                                       | 2.137611982    | PSMB8                    | proteasome (prosome, macropath) subunit, beta type 8                                                  | 2.783692784      |
| PEG3          | —                                                                                                      | 2.136130816    | M64d4b (includes others) | —                                                                                                     | 2.749177391      |
| CEBPG         | CCAAT/enhancer binding protein (C/EBP), gamma                                                          | 2.11696879     | RSAD2                    | radical S-adenosyl methionine domain containing 2                                                     | 2.711328654      |
| D630004K10Rik | RIKEN cDNA D630004K10 gene                                                                             | 2.112571251    | IFI47                    | interferon gamma inducible protein 47                                                                 | 2.696335463      |
| WISP1         | WNT1 inducible signaling pathway protein 1                                                             | 2.108182847    | C3AR1                    | complement component 3a receptor 1                                                                    | 2.681425183      |
| HERPUD1       | herpesvirus thymidine kinase interacting protein                                                       | 2.1023445818   | IGJ                      | immunoglobulin J polypeptide, linker protein for immunoglobulin alpha and mu polypeptides             | 2.633533844      |
| VLDLR         | very low density lipoprotein receptor                                                                  | 2.086377187    | FCER1G                   | Fc fragment of IgE high affinity L receptor for gamma polypeptide                                     | 2.626242251      |
| CDCA2BPG      | CDCA2 binding protein kinase gamma (DMPK-like)                                                         | 2.06095163     | IFIT1B                   | interferon-induced protein with tetratricopeptide repeats 1B                                          | 2.611719574      |
| EF4EBP1       | eukaryotic translation initiation factor 4E binding protein 1                                          | 2.063363659    | CCL2                     | chemokine (C-C motif) ligand 2                                                                        | 2.593679109      |
| SLC6A9        | solute carrier family 6 (neurotransmitter transporter, glycine), member 9                              | 2.059080167    | BA3P1                    | brain abundant, membrane attached signal protein 1                                                    | 2.584705661      |
| CPT1A         | carbamate palmitoyltransferase 1A (liver)                                                              | 2.054802879    | SCD                      | stearyl-CoA desaturase (delta9-desaturase)                                                            | 2.573978495      |
| EF3C/EF3CL    | eukaryotic translation initiation factor 3, subunit C                                                  | 2.043440165    | PSMB9                    | proteasome (prosome, macropath) subunit, beta type 9                                                  | 2.517514347      |
| RNF39         | ring finger protein 39                                                                                 | 1.990685744    | HLA-C                    | major histocompatibility complex, class I, C                                                          | 2.503592917      |
| GP72          | glucamic pyruvate transaminase (alanine aminotransferase) 2                                            | 1.976571303    | RAC2                     | ras-related C3 botulinum toxin substrate 2 (rho family, small GTP binding protein Rac2)               | 2.503592917      |
| NABP2L1       | NEDD4 binding protein 2-like 1                                                                         | 1.968388804    | B2M                      | beta-2-microglobulin                                                                                  | 2.496661098      |
| ATF4          | activating transcription factor 4                                                                      | 1.945309895    | TRIM30A/TRIM30d          | —                                                                                                     | 2.4794154        |
| PTN           | pleiotrophin                                                                                           | 1.937236378    | GBP4                     | guanylate binding protein 4                                                                           | 2.453769955      |
| FAP           | fibroblast activation protein, alpha                                                                   | 1.929196369    | ITGB2                    | integrin, beta 2 (complement component 3 receptor 3 and 4 subunit)                                    | 2.443586203      |
| KC1D15        | potassium channel tetramerization domain containing 15                                                 | 1.921189728    | EGFR1                    | early growth response 1                                                                               | 2.438510188      |
| KIF2A         | kinesin heavy chain member 2A                                                                          | 1.921189728    | ApoA9/ApoA9b             | apolipoprotein L 9b                                                                                   | 2.418311352      |
| ATP5A2        | ATPase type 13A2                                                                                       | 1.885569072    | XAF1                     | XIAP associated factor 1                                                                              | 2.413287839      |
| AAARS         | alaninyl-HRNA synthetase                                                                               | 1.881652215    | MSI2                     | musashi RNA-binding protein 2                                                                         | 2.413287839      |
| FBN17         | fibulin 7                                                                                              | 1.880348405    | CXCL9                    | chemokine (C-X-C motif) ligand 9                                                                      | 2.408274762      |
| SEPT6         | septin 6                                                                                               | 1.875142193    | BS2                      | bone marrow stromal cell antigen 2                                                                    | 2.386671486      |
| SNORD22       | small nuclear RNA, C/D box 22                                                                          | 1.869950396    | FP22                     | formyl peptide receptor 2                                                                             | 2.381713699      |
| CNPPD1        | cyclin Pos1/PHO80 domain containing 1                                                                  | 1.860659583    | CMPK2                    | immunoglobulin heavy constant alpha 1                                                                 | 2.366902044      |
| TAFA          | TAFII RNA polymerase II, TAFII box binding protein (TBP)-associated factor, 135kDa                     | 1.860899315    | FCGR3A                   | cytidine monophosphate (UMP-CMP) kinase 2, mitochondrial                                              | 2.365262         |
| TEF           | thymotrophic embryonic factor                                                                          | 1.855746953    | GLI1P1                   | Fc fragment of IgG; low affinity IIa receptor (CD16a)                                                 | 2.348923942      |
| SLCSA3        | solute carrier family 5 (sodium/myo-inositol cotransporter), member 3                                  | 1.842928372    | LYO2 (includes others)   | GLI pathogenesis-related 1                                                                            | 2.342420362      |
| SARS          | sevri-HRNA synthetase                                                                                  | 1.841651394    | G4LE                     | —                                                                                                     | 2.305372694      |
| LONR3         | LON peptidase N-terminal domain and ring finger 3                                                      | 1.837825767    | MZB1                     | UDP-galactose-4-epimerase                                                                             | 2.305372694      |

Continued on next page

## Supplementary Table S3. Continued.

| Symbol     | Gene name                                                                    | Fold change up | Symbol                   | Gene name                                                                          | Fold change down |
|------------|------------------------------------------------------------------------------|----------------|--------------------------|------------------------------------------------------------------------------------|------------------|
| KIF16B     | kinesin family member 16B                                                    | 1.8263945      | USP18                    | ubiquitin specific peptidase 18                                                    | 2.28627671       |
| SLC1A4     | solute carrier family 1 (glutamate/neutral amino acid transporter), member 4 | 1.82386331     | EMR1                     | egr-like module containing muscin-like, hormone receptor-like 1                    | 2.27836754       |
| ASNS       | asparagine synthetase (glutamine-hydrolyzing)                                | 1.815038311    | IGF1                     | isoprenyl-diphosphate delta isomerase 1                                            | 2.26891097       |
| JDP2       | Jun dimerization protein 2                                                   | 1.809758755    | Id1                      | inhibitor gamma induced G1Phase                                                    | 2.264197804      |
| NARS       | asparaginyl-HRNA synthetase                                                  | 1.805001465    | M646dc                   | membrane-spanning 4-domains, subfamily A, member 6C                                | 2.259494429      |
| PEX11A     | peroxisomal biogenesis factor 11, alpha                                      | 1.803750757    | G-vin1 (includes others) | —                                                                                  | 2.259494429      |
| SORD       | sorbitol dehydrogenase                                                       | 1.797510253    | CORO1A                   | coronin, actin binding protein, 1A                                                 | 2.25792881       |
| Mk67       | antigen identified by monoclonal antibody Ki47                               | 1.796264746    | CD53                     | CD53 molecule                                                                      | 2.256334275      |
| SMOCC2     | SPARC related modular calcium binding 2                                      | 1.79129134     | C1GB                     | complement component 1, q subcomponent, B chain                                    | 2.253238457      |
| PHF10      | PHD finger protein 10                                                        | 1.786331705    | IV86                     | lymphocyte antigen 86                                                              | 2.263238457      |
| PPP1R12C   | protein phosphatase 1, regulatory subunit 12C                                | 1.782620992    | GA32                     | growth arrest-specific 2                                                           | 2.248557846      |
| SLC38A9    | solute carrier family 38, member 9                                           | 1.780151467    | TRC                      | transferrin receptor                                                               | 2.245442844      |
| COL4A5     | collagen, type IV, alpha 5                                                   | 1.776453592    | Gp88                     | guanylate-binding protein 8                                                        | 2.242332156      |
| PAN3       | PAN3 poly(A) specific ribonuclease subunit homolog (S. cerevisiae)           | 1.766630103    | EB13                     | Epstein-Barr virus induced 3                                                       | 2.237674202      |
| TC2N       | tandem C2 domains, nuclear                                                   | 1.762960316    | IFITD2B                  | interferon activated gene 202B                                                     | 2.236123702      |
| VNN1       | vanin 1                                                                      | 1.759298152    | Wfoc17                   | WAP four-disulfide core domain 17                                                  | 2.225302021      |
| DEPTOR     | DEP domain containing TOR-interacting protein                                | 1.751996663    | OAS1                     | 2'-5'-oligoadenylate synthetase 1.40/46kDa                                         | 2.223758315      |
| NXF2/NXF2B | nuclear RNA export factor 2                                                  | 1.744725412    | Gp66 (includes others)   | guanylate binding protein 6                                                        | 2.203810232      |
| GA85       | glycyl-HRNA synthetase                                                       | 1.743516479    | Oas2                     | 2'-5'-oligoadenylate synthetase-like 2                                             | 2.174976782      |
| UPF2       | UPF2 regulator of nonsense transcripts homolog (yeast)                       | 1.741101127    | NGF                      | nerve growth factor (beta polypeptide)                                             | 2.15546629       |
| DHFD1      | dehydrogenase E1 and transketolase domain containing 1                       | 1.739894705    | RTP4                     | receptor (chemosensory) transporter protein 4                                      | 2.15546629       |
| ACADL      | acyl-CoA dehydrogenase, long chain                                           | 1.738689712    | SERPINA3                 | serpin peptidase inhibitor, clade A (alpha-1 antitrypsin), member 3                | 2.153972752      |
| LPO        | lactoperoxidase                                                              | 1.736280455    | ZBP1                     | Z-DNA binding protein 1                                                            | 2.109644634      |
| CTH        | cystathionase (cystathionine gamma-lyase)                                    | 1.732673713    | NFKB2                    | nuclear factor of kappa light polypeptide gene enhancer in B-cells inhibitor, zeta | 2.097978655      |
| PHF3       | PHD finger protein 3                                                         | 1.730273381    | PIPRC                    | protein tyrosine phosphatase, receptor type, C                                     | 2.095072254      |
| CTD41      | —                                                                            | 1.729092319    | Gp62                     | guanylate binding protein 2                                                        | 2.093620564      |
| ADHFE1     | alcohol dehydrogenase, iron containing, 1                                    | 1.721898837    | IER3                     | immediate early response 3                                                         | 2.084931522      |
| PNPLA7     | patatin-like phospholipase domain containing 7                               | 1.715941061    | KLK3                     | kallikrein-related peptidase 3                                                     | 2.073402202      |
| TRIM24     | —                                                                            | 1.706452196    | C4orf32                  | chromosome 4 open reading frame 32                                                 | 2.071965527      |
| DDX27      | DEAD (Asp-Glu-Ala-Gly) box polypeptide 27                                    | 1.705269784    | IFI44L                   | interferon-induced protein 44-like                                                 | 2.065079207      |
| RAP2EF3    | Rap guanine nucleotide exchange factor (GEF) 3                               | 1.704088819    | S100A1                   | S100 calcium binding protein A1                                                    | 2.030732202      |
| CRISP1D2   | glycine-rich secretory protein LCCL domain containing 2                      | 1.702901745    | LY6E                     | lymphocyte antigen 6 complex, locus E                                              | 2.025109615      |
| EP85       | glutamyly-prolyl-HRNA synthetase                                             | 1.701727459    | TYROBP                   | TYRO protein tyrosine kinase binding protein                                       | 2.020202893      |
| TABS       | threonyl-HRNA synthetase                                                     | 1.701727459    | Cc6                      | chemokine (C-C motif) ligand 6                                                     | 2.018103268      |
| LCORL      | ligand dependent nuclear receptor corepressor-like                           | 1.694664487    | IFITM2                   | interferon induced transmembrane protein 2                                         | 2.015307521      |
| IPK3       | tumor protein p63                                                            | 1.694664487    | ELOVL6                   | ELOVL fatty acid elongase 6                                                        | 2.015307521      |
| CRY2       | cryptochrome 2 (photolyase-like)                                             | 1.688801775    | SLAMF9                   | SLAM family member 9                                                               | 1.994462593      |
| DTMA       | dehydrogenase 2 (photolyase-like)                                            | 1.687631592    | SAMD9L                   | sterile alpha motif domain containing 9-like                                       | 1.991699506      |
| LAMA3      | laminin, alpha 3                                                             | 1.686462221    | SLC15A3                  | solute carrier family 15 (oligopeptide transporter), member 3                      | 1.986184991      |
| DHR54      | dehydrogenase/reductase (SDR family) member 4                                | 1.684125907    | MAF                      | v-maf avian musculoaponeurotic fibrosarcoma oncogene homolog                       | 1.984808749      |
| TIAM1      | T-cell lymphoma invasion and metastasis 1                                    | 1.682958965    | TU882A                   | tubulin, beta 2A class Ia                                                          | 1.984808749      |
| SYL3       | synaptotagmin-like 3                                                         | 1.681792831    | EV2A                     | ectopic viral integration site 2A                                                  | 1.971098674      |
| RPUSD2     | RNA pseudouridylylase synthase domain containing 2                           | 1.675974269    | GRP93                    | G protein-coupled receptor 31                                                      | 1.971098674      |
| MYC        | v-myc avian myelocytomatosis viral oncogene homolog                          | 1.675974269    | FCGR1A                   | Fc fragment of IgG, high affinity Ia, receptor (CD64)                              | 1.937236378      |
| SLC25A34   | solute carrier family 25, member 34                                          | 1.670175839    | SIAT1                    | signal transducer and activator of transcription 1, 9 kbDa                         | 1.930653405      |
| FMO5       | flavin monooxygenase                                                         | 1.667862088    | LGALS1                   | lectin, galactose-binding, soluble, 1                                              | 1.927859615      |
| NR1D2      | dehydrogenase/reductase (SDR family) member 4                                | 1.6653244197   | GATM                     | glycine amidinotransferase 1                                                       | 1.926523788      |
| GLISCR1L   | GLISCR1-like                                                                 | 1.663244197    | PIP4K2A                  | phosphatidylinositol-5-phosphate 4-kinase, type II, alpha                          | 1.921189728      |
| SPRED1     | solute carrier family 25 (carnitine/acylcarnitine translocase), member 20    | 1.663244197    | NCF4                     | neutrophil cytosolic factor 4, 40kDa                                               | 1.915870436      |
| SLC25A20   | solute carrier family 25 (carnitine/acylcarnitine translocase), member 20    | 1.663244197    | CYBA                     | cytochrome b-245, alpha polypeptide                                                | 1.914542916      |
| HEPH       | hephaestin                                                                   | 1.657489809    | CESSA                    | carboxylesterase 5A                                                                | 1.905275996      |
| NADK2      | NAD kinase 2, mitochondrial                                                  | 1.657489809    | PPA1                     | pyrophosphatase (inorganic) 1                                                      | 1.903956817      |
| HTRA3      | HTRA serine peptidase 3                                                      | 1.650467937    | KIAA0100                 | KIAA0100                                                                           | 1.901318202      |
| HNRNP1     | heterogeneous nuclear ribonucleoprotein A1                                   | 1.650610811    | CD48                     | CD48 molecule                                                                      | 1.896063993      |
| G/PBP4     | GTP binding protein 4                                                        | 1.650610811    | SRSF3                    | serine/arginine-rich splicing factor 3                                             | 1.892115293      |
| SLC6A20    | solute carrier family 6 (proline/IMINO transporter), member 20               | 1.64832417     | C15C                     | complement component 1, q subcomponent, C chain                                    | 1.889494082      |
| DUSP6      | dual specificity phosphatase 6                                               | 1.645730375    | LDLR                     | low density lipoprotein receptor                                                   | 1.877743495      |
| EHMT2      | euchromatic histone-lysine N-methyltransferase 2                             | 1.642621402    | COCH                     | —                                                                                  | 1.871246996      |
| DGKZ       | diacylglycerol kinase, zeta                                                  | 1.641483218    | ACYY2                    | acylphosphatase 2, muscle type                                                     | 1.871246996      |
| FBP2       | fructose-1,6-bisphosphatase 2                                                | 1.641483218    | RCHJ1                    | ras homolog family member J                                                        | 1.860899315      |
| FBXO32     | F-box protein 32                                                             | 1.640345822    | HERC6                    | HECT and RLD domain containing E3 ubiquitin protein ligase family member 6         | 1.839100092      |
| PSPH       | phosphoserine phosphatase                                                    | 1.639209215    | NRIF3                    | nuclear receptor interacting protein 3                                             | 1.832737289      |
| MJMI       | melanoma associated antigen (mutated) 1                                      | 1.639209215    | CFP                      | complement factor properdin                                                        | 1.831467373      |
| TPR        | translocated promoter region, nuclear basket protein                         | 1.636593863    | MAIRCH1                  | membrane-associated ring finger (C3HC4) 1, E3 ubiquitin protein ligase             | 1.825130977      |
| TSC22D3    | TSC22 domain family, member 3                                                | 1.635804117    | HCL1S1                   | hematopoietic cell-specific Lyn substrate 1                                        | 1.822602561      |
| TYRO3      | TYRO3 protein tyrosine kinase                                                | 1.635804117    | PKB                      | protein kinase (CAMP-dependent; catalytic) inhibitor beta                          | 1.821339667      |
| IRC2BP2    | inhibitor regulatory factor 2 binding protein 2                              | 1.634670657    | CAPN3                    | calpain 3, (p94)                                                                   | 1.820077648      |
| EIF2S2     | eukaryotic translation initiation factor 2, subunit 2, beta, 38kDa           | 1.633537982    | JUN                      | jun proto-oncogene                                                                 | 1.813780658      |
| RCPN1L     | rhoGAP1 associated tail protein 1-like                                       | 1.630144665    | PLEK                     | pleckstrin                                                                         | 1.812523877      |

Continued on next page

Supplementary Table S3. Continued.

| Symbol     | Gene name                                                                                                    | Fold change up | Symbol                   | Gene name                                                                      | Fold change down |
|------------|--------------------------------------------------------------------------------------------------------------|----------------|--------------------------|--------------------------------------------------------------------------------|------------------|
| MAP3K4     | mitogen-activated protein kinase kinase kinase 4                                                             | 1.62788637     | TMSB10/TMSB4X            | —                                                                              | 1.807505454      |
| RBBP6      | retinoblastoma binding protein 6                                                                             | 1.626758396    | FVB                      | FYN binding protein                                                            | 1.80925302       |
| EEA1       | early endosome antigen 1                                                                                     | 1.623379162    | CCR4ML                   | CCR4 carbon catabolite repression 4-like (S. cerevisiae)                       | 1.80125196       |
| HECA       | hectadecan homolog (Drosophila)                                                                              | 1.622254311    | SULT1C3                  | sulfotransferase family, cytosolic, 1C, member 3                               | 1.80000386       |
| GF3C2      | general transcription factor IIIC, polypeptide 2, beta 110kDa                                                | 1.62173024     | EpsH1                    | epithelial stromal interaction 1 (breast)                                      | 1.798756624      |
| G-ABARAPL1 | GABA(A) receptor-associated protein like 1                                                                   | 1.617176297    | C1GA                     | complement component 1, alpha subcomponent 1, A chain                          | 1.793716319      |
| Acaalb     | acetyl-Coenzyme A acyltransferase 1B                                                                         | 1.616641738    | CA13                     | carbonic anhydrase XIII                                                        | 1.792533399      |
| GRF1       | G-rich RNA sequence binding factor 1                                                                         | 1.616521555    | MSA47                    | stromal cell-derived factor 2-like 1                                           | 1.792533399      |
| EEF2K      | eukaryotic elongation factor-2 kinase                                                                        | 1.612165663    | TMX1                     | membrane-spanning 4-domains, subfamily A, member 7                             | 1.790950142      |
| ADCK3      | arid domain containing kinase 3                                                                              | 1.612165663    | IRGM                     | thioredoxin-related transmembrane protein 1                                    | 1.786260992      |
| GLUL       | glutamate-aminonia ligase                                                                                    | 1.611048882    | SLA                      | immunity-related GTPase family, M                                              | 1.782670325      |
| FAM135A    | family with sequence similarity 135, member A                                                                | 1.609932275    | IFI202                   | Src-like adaptor                                                               | 1.778917987      |
| NCL        | nucleolin                                                                                                    | 1.609932275    | IFI202 (includes others) | interferon activated gene 204                                                  | 1.77399261       |
| H6PD       | hexose-6-phosphate dehydrogenase (glucose 1-dehydrogenase)                                                   | 1.609932275    | MAN1A1                   | mannosidase, alpha, class 1A, member 1                                         | 1.772763398      |
| CITEF2     | Cbp/p300-interacting transcription factor, with Glu/Asp-rich carboxy-terminal domain, 2                      | 1.605474777    | LYVE1                    | lymphatic vessel endothelial hyaluronan receptor 1                             | 1.767855042      |
| ERBB3      | v-erb-b2 avian erythroblastic leukemia viral oncogene homolog 3                                              | 1.604362333    | AW112010                 | expressed sequence AW112010                                                    | 1.767855042      |
| ADORA1     | adenosine A1 receptor                                                                                        | 1.602139755    | LPXN                     | leupaxin                                                                       | 1.767855042      |
| YARS       | tyrosyl-tRNA synthetase                                                                                      | 1.599202057    | CP                       | caruloplasmin (ferroxidase)                                                    | 1.767855042      |
| SON3DACH   | sonosudach ankyrin repeat domain family member A                                                             | 1.599202057    | H2-L                     | histocompatibility 2, D region locus L                                         | 1.767855042      |
| H53T3B1    | heparan sulfate (glucosamine) 3-O-sulfotransferase 3B1                                                       | 1.598811661    | Cox8b                    | cytochrome c oxidase subunit VIIIb                                             | 1.7626960316     |
| MGA        | MGA, MAX dimerization protein                                                                                | 1.597703833    | GBP7                     | guanylate binding protein 7                                                    | 1.758079122      |
| AUTS2      | —                                                                                                            | 1.597703833    | LRG1                     | leucine-rich alpha-2-glycoprotein 1                                            | 1.758079122      |
| FTS3       | Fts3 homolog 3 (E. coli)                                                                                     | 1.596596773    | FERMT3                   | fermitin family member 3                                                       | 1.755860936      |
| AGMO       | alkylglycerol monooxygenase                                                                                  | 1.596596773    | NABP1                    | nucleic acid binding protein 1                                                 | 1.75199663       |
| ZFYVE1     | zinc finger, FYVE domain containing 1                                                                        | 1.59549048     | TNFRSF12A                | tumor necrosis factor receptor superfamily, member 12A                         | 1.75199663       |
| ABI3BP     | ABI family member 3 (NESH) binding protein                                                                   | 1.594384953    | PEI100                   | PEI100 homolog (S. cerevisiae)                                                 | 1.750782659      |
| PRR2       | regulation of nuclear pre-mRNA domain containing 2                                                           | 1.592176198    | IFB7                     | interferon regulatory factor 7                                                 | 1.74956963       |
| HADHB      | hydroxyacyl-CoA dehydrogenase/3-ketoadyl-CoA thiolase/enoyl-CoA hydratase (functional protein), beta subunit | 1.587767862    | SRGN                     | seignin                                                                        | 1.747145792      |
| SCARA5     | scavenger receptor class A, member 5 (putative)                                                              | 1.587767862    | IFI2T2                   | interferon, alpha-inducible protein 27-like 2                                  | 1.743516479      |
| SIC19A2    | solute carrier family 11 (thiamine transporter), member 2                                                    | 1.586667686    | SIC11A1                  | regulator of G-protein signaling 2, 24kDa                                      | 1.739290874      |
| TAM2       | T-cell lymphoma invasion and metastasis 2                                                                    | 1.585568273    | RG32                     | DEXH (Asp-Glu-X-Hs) box polypeptide 58                                         | 1.739290874      |
| KIAA1737   | KIAA1737                                                                                                     | 1.583371732    | HMX58                    | GRPase, IMAP family member 4                                                   | 1.737848437      |
| ALDH1L2    | aldehyde dehydrogenase 1 family, member L2                                                                   | 1.583371732    | GIMAF4                   | complement component 3                                                         | 1.736280455      |
| PER3       | period circadian clock 3                                                                                     | 1.582274602    | C3                       | complement component 3                                                         | 1.736280455      |
| PLXND2     | phosphatidylinositol-specific phospholipase C, X domain containing 2                                         | 1.581178233    | DBI                      | diazepam binding inhibitor (GABA receptor modulator, acyl-CoA binding protein) | 1.735077374      |
| ABCC9      | ATP-binding cassette, sub-family C (CFR/MRP), member 9                                                       | 1.579600048    | GCHI                     | GTP cyclohydratase 1                                                           | 1.733875127      |
| DSP        | desmoplakin                                                                                                  | 1.579570772    | LGALS3BP                 | lectin, galactose-binding, soluble, 3 binding protein                          | 1.728679117      |
| TRM37      | tripartite motif containing 37                                                                               | 1.579570772    | GBP2                     | guanylate binding protein 2, interferon-inducible                              | 1.723092319      |
| GKAP1      | G kinase anchoring protein 1                                                                                 | 1.574615953    | CTSS                     | cathepsin S                                                                    | 1.723092319      |
| FOXRED2    | FAD-dependent oxidoreductase domain containing 2                                                             | 1.574615953    | ARRGDIB                  | Rho GDP dissociation inhibitor (GDI) beta                                      | 1.7173130873     |
| FAM64B     | family with sequence similarity 84, member B                                                                 | 1.573524891    | RIKEN cDNA 503343015.9k  | RIKEN cDNA 503343015 gene                                                      | 1.7171310873     |
| CTSDP2     | CTD (carboxy-terminal domain, RNA polymerase II, polypeptide A) small phosphatase 2                          | 1.573524891    | ACTB                     | actin, beta                                                                    | 1.715941061      |
| TMEM209    | transmembrane protein 209                                                                                    | 1.572434584    | SURP                     | SPA stem-loop interacting RNA binding protein                                  | 1.712376569      |
| NPM1       | nucleophosmin (nucleolar phosphoprotein B23, nuradlin)                                                       | 1.572434584    | LGMIN                    | legumin                                                                        | 1.712376569      |
| AC02       | acyl-CoA thioesterase 2                                                                                      | 1.571345033    | MSN                      | moesin                                                                         | 1.71190061       |
| PEX17G     | peroxisomal biogenesis factor 11 gamma                                                                       | 1.569168196    | IFM2                     | immunofly-related GTPase family M member 2                                     | 1.711190061      |
| DRP4       | dipeptidyl-peptidase 4                                                                                       | 1.569168196    | IGSF6                    | immunoglobulin superfamily, member 6                                           | 1.704452196      |
| CRY1       | cryptochrome 1 (photolyase-like)                                                                             | 1.569168196    | CCND1                    | cyclin D1                                                                      | 1.705269784      |
| LARS       | leucyl-tRNA synthetase                                                                                       | 1.569168196    | IFIT2                    | interferon-induced protein with tetratricopeptide repeats 2                    | 1.697015803      |
| Aox3       | aldehyde oxidase 3                                                                                           | 1.569168196    | INTS2                    | integrator complex subunit 2                                                   | 1.695839929      |
| INPP5K     | inositol polyphosphate-5-phosphatase K                                                                       | 1.568080908    | BDH1                     | 3-hydroxybutyrate dehydrogenase, type 1                                        | 1.69466487       |
| TMK2       | tyrosine kinase, non-receptor, 2                                                                             | 1.568080908    | CH229/Ch22b              | cytokinetic lymphocyte-associated protein 2, alpha                             | 1.693490625      |
| EP3A       | eukaryotic translation initiation factor 3, subunit A                                                        | 1.566006908    | NME1                     | NME1/NM23 nucleoside diphosphate kinase 1                                      | 1.693490625      |
| RORC       | retinoid receptor                                                                                            | 1.565908893    | CASP1                    | caspase 1, apoptosis-related cysteine peptidase                                | 1.688801775      |
| HDAC11     | histone deacetylase 11                                                                                       | 1.565908893    | FABP4                    | fatty acid binding protein 4, adipocyte                                        | 1.688801775      |
| SIC38A2    | solute carrier family 38, member 2                                                                           | 1.565908893    | BCL3                     | BCL3 family member 3                                                           | 1.68801775       |
| ITM2A      | integral membrane protein 2A                                                                                 | 1.564823563    | NDRG1                    | N-myc downstream regulated 1                                                   | 1.68462221       |
| SIC23A1    | solute carrier family 23 (ascorbic acid transporter), member 1                                               | 1.564823563    | SUFN1/2L                 | —                                                                              | 1.681792831      |
| PPAT       | phosphatidyl pyrophosphate amidotransferase                                                                  | 1.563792984    | PSMB10                   | proteasome (prosome, macropain) subunit, beta type, 10                         | 1.68027594       |
| YPO1       | scitibled planar cell polarity protein                                                                       | 1.563792984    | S100A6                   | S100 calcium binding protein A6                                                | 1.679462986      |
| SCRIB      | scribble planar cell polarity protein                                                                        | 1.559409885    | H2-S6                    | histocompatibility 2, epsilon locus 5                                          | 1.675974289      |
| UCHL5      | ubiquitin carboxy-terminal hydrolase L5                                                                      | 1.559329159    | FLBD1                    | phosphoinositide 3-kinase domain containing 1                                  | 1.674812975      |
| PLCLR      | prolactin receptor                                                                                           | 1.555092072    | UQC22                    | ubiquitin-cytochrome c reductase complex assembly factor 2                     | 1.673652485      |
| NCLB       | nucleolar protein 8                                                                                          | 1.554014538    | HSP90B1                  | heat shock protein 90kDa beta (Grp94), member 1                                | 1.6724928        |
| DPEF1      | dipeptidase 1 (renin)                                                                                        | 1.554014538    | PDGFD                    | platelet derived growth factor D                                               | 1.671333918      |
| HNRNP1     | heterogeneous nuclear ribonucleoprotein L                                                                    | 1.554014538    | IGK                      | immunoglobulin kappa chain complex                                             | 1.670175839      |
| SRP68      | signal recognition particle 68kDa                                                                            | 1.55293775     | HSP2BP                   | heat shock transcription factor 2 binding protein                              | 1.670175839      |
| RXRB       | retinoid X receptor, beta                                                                                    | 1.55293775     | P1PKK                    | protein tyrosine phosphatase, receptor type, K                                 | 1.667862088      |
| SEI3       | —                                                                                                            | 1.551861709    | GOLT1B                   | golgi transport 1B                                                             | 1.663241917      |

Continued on next page



Supplementary Table S3. Continued.

| Symbol            | Gene name                                                                                     | Fold change up | Symbol                   | Gene name                                                                         | Fold change down |
|-------------------|-----------------------------------------------------------------------------------------------|----------------|--------------------------|-----------------------------------------------------------------------------------|------------------|
| HNRP1U            | heterogeneous nuclear ribonucleoprotein U (scaffold attachment factor A)                      | 1.551861709    | C19orf10                 | chromosome 19 open reading frame 10                                               | 1.60940048       |
| LEM2D             | —                                                                                             | 1.550784013    | CFB                      | complement factor B                                                               | 1.659789171      |
| DRK1A             | dual-specificity tyrosine-(Y)-phosphorylation regulated kinase 1A                             | 1.550786413    | CcPp                     | chemokine (C-C motif) ligand 9                                                    | 1.659789171      |
| ISG20L2           | —                                                                                             | 1.550786413    | NUD25                    | nucleoside diphosphate linked moiety X-type motif 5                               | 1.659789171      |
| SLC9A3R2          | solute carrier family 9, subfamily A (NHE3, cation proton antiporter 3), member 3 regulator 2 | 1.549711862    | LSM6                     | LSM6 homolog, US small nuclear RNA associated (S. cerevisiae)                     | 1.657489809      |
| TAF1D             | TAF1A box binding protein (TBP)-associated factor, RNA polymerase I, D, 41kDa                 | 1.549711862    | STAF1                    | signal transducing adaptor family member 1                                        | 1.657489809      |
| FAM63A            | family with sequence similarity 63, member A                                                  | 1.548638056    | S100A9                   | S100 calcium binding protein A9                                                   | 1.652900636      |
| HCOX2             | hook microtubule-tethering protein 2                                                          | 1.546492675    | MAL                      | mol. T-cell differentiation protein                                               | 1.652900636      |
| ASRGL1            | asparaginase like 1                                                                           | 1.545421099    | ITGAM                    | integrin, alpha M (complement component 3 receptor 3 subunit)                     | 1.65175633       |
| DGKG              | diacylglycerol kinase, gamma 90kDa                                                            | 1.545421099    | LCP2                     | lymphocyte cytosolic protein 2 (SH2 domain containing leukocyte protein of 76kDa) | 1.649040691      |
| RCC2              | regulator of chromosome condensation 2                                                        | 1.544350266    | PLAC8                    | placenta-specific 8                                                               | 1.648900137      |
| HSP19             | heat shock 70kDa protein 9 (montain)                                                          | 1.543280175    | Sra                      | seminal vesicle antigen                                                           | 1.643760375      |
| ANKRD12           | ankyrin repeat domain 12                                                                      | 1.543280175    | DDX6                     | DEAD (Asp-Glu-Ala-Asp) box helicase 6                                             | 1.638073396      |
| PKI3C2G           | phosphatidylinositol(4)-phosphate 3-kinase, catalytic subunit type 2, gamma                   | 1.543280175    | UBA7                     | ubiquitin-like modifier activating enzyme 7                                       | 1.638073396      |
| KTN1              | kinesin 1 (kinesin receptor)                                                                  | 1.543280175    | HSD17B12                 | hydroxysteroid (17-beta) dehydrogenase 12                                         | 1.636938363      |
| IL6ST             | interleukin 6 signal transducer (gp130, oncostatin M receptor)                                | 1.543280175    | S100A4                   | S100 calcium binding protein A4                                                   | 1.636938363      |
| ODF2              | outer dense fiber of sperm tails 2                                                            | 1.543280175    | AZIN1                    | antizyme inhibitor 1                                                              | 1.632406092      |
| NANPC1            | anaphase promoting complex subunit 16                                                         | 1.542210825    | NA4A                     | N-acetylthioamide acid amidase                                                    | 1.630144665      |
| NUA2              | nuclear protein, transcriptional regulator, 1                                                 | 1.541142217    | Wfcb18                   | WAP four-disulfide core domain 18                                                 | 1.629758396      |
| INP35B            | inositol polyphosphate-5-phosphatase, 75kDa                                                   | 1.540074848    | WFD2C                    | WAP four-disulfide core domain 2                                                  | 1.624604793      |
| PHYH              | phytanoyl-CoA 2-hydroxylase                                                                   | 1.540074848    | LMAN1                    | lectin, mannose-binding, 1                                                        | 1.623379162      |
| ARL14EP           | ADP-ribosylation factor-like 14 effector protein                                              | 1.539007022    | LD83                     | —                                                                                 | 1.616641738      |
| ANGPTL4           | angiotensin-like 4                                                                            | 1.539007022    | HLA-F                    | major histocompatibility complex, class I, F                                      | 1.615521555      |
| COL4A2            | collagen, type IV, alpha 2                                                                    | 1.539007022    | PPP1R3C                  | protein phosphatase 1, regulatory subunit 3C                                      | 1.613283518      |
| HistH4            | histone cluster 2, H4                                                                         | 1.537940831    | UXS1                     | UDP-glucuronate decarboxylase 1                                                   | 1.609932275      |
| (includes others) |                                                                                               |                |                          |                                                                                   |                  |
| HPGD              | hydroxyprostaglandin dehydrogenase 15-(NAD)                                                   | 1.537940831    | Zfp932 (includes others) | zfp finger protein 932                                                            | 1.608816742      |
| VWA8              | von Willebrand factor A domain containing 8                                                   | 1.537940831    | P2RY14                   | purinergic receptor P2Y, G-protein coupled, 14                                    | 1.608816742      |
| CUL4B             | culin 4B                                                                                      | 1.536875181    | STXB5L                   | syntaxin binding protein 5-like                                                   | 1.608816742      |
| LTBP3             | latent transforming growth factor beta binding protein 3                                      | 1.536875181    | NDUFA5                   | NADH dehydrogenase (ubiquinone) complex I, assembly factor 5                      | 1.607019181      |
| STMN1             | stathmin 1                                                                                    | 1.536875181    | Pnl1/Prp2                | proline rich protein Hoell subfamily 1                                            | 1.606897994      |
| FNPI1             | folliculin interacting protein 1                                                              | 1.534746096    | SP1                      | secreted phosphoprotein 1                                                         | 1.605474777      |
| FAM129A           | family with sequence similarity 129, member A                                                 | 1.533682626    | CCNY                     | cyclin Y                                                                          | 1.602139755      |
| SEDF2             | SET domain containing (lysine methyltransferase) 7                                            | 1.533682626    | MITD1                    | MIT, microtubule interacting and transport, domain containing 1                   | 1.602139755      |
| POLR3A            | polymyrase (RNA) III (DNA directed) polypeptide A, 155kDa                                     | 1.533682626    | Mup1 (includes others)   | —                                                                                 | 1.601029621      |
| RORA              | RAR-related orphan receptor A                                                                 | 1.531557997    | ODC1                     | ornithine decarboxylase 1                                                         | 1.601029621      |
| AB32039N20Rik     | RKEN cDNA, AB32039N20 gene                                                                    | 1.531557997    | SERPINB5                 | serpin peptidase inhibitor, clade B (ovalbumin), member 5                         | 1.599920257      |
| MMS19             | MMS19 nucleotide excision repair homolog (S. cerevisiae)                                      | 1.529456278    | Cyc5                     | cytochrome c, somatic                                                             | 1.599202057      |
| GRR155            | G-protein-coupled receptor 155                                                                | 1.529456278    | CYP22                    | cytochrome P-450, CYP22                                                           | 1.598811661      |
| FAM110C           | family with sequence similarity 110, member C                                                 | 1.528376521    | PRPF31                   | pre-mRNA processing factor 31                                                     | 1.596596773      |
| UPF3B             | UPF3 regulator of nonsense transcripts homolog B (yeast)                                      | 1.528376521    | HLA-B                    | HLA-B                                                                             | 1.596596773      |
| SLAIN2            | SLAIN motif family, member 2                                                                  | 1.528376521    | LGALS3                   | lectin, galactoside-binding, soluble, 3                                           | 1.596596773      |
| HMI13             | histocompatibility (minor) 13                                                                 | 1.527317498    | Cp9orf16                 | chromosome 9 open reading frame 16                                                | 1.594309048      |
| NFKK              | zfp finger protein 992                                                                        | 1.526259209    | APOL3                    | —                                                                                 | 1.594309048      |
| ZNF592            | zfp finger protein 592                                                                        | 1.526259209    | CLEC2D                   | C-type lectin domain family 2, member D                                           | 1.594309048      |
| XPO5              | exportin 5                                                                                    | 1.525201653    | SLC41A2                  | solute carrier family 41 (magnesium transporter), member 2                        | 1.592176198      |
| SEMA3D            | semaphorin 3D                                                                                 | 1.525201653    | 0610040B09Rik            | RKEN cDNA, 0610040B09 gene                                                        | 1.5888688        |
| SLC16A7           | solute carrier family 16 (monocarboxylate transporter), member 7                              | 1.52414483     | PFM1K                    | protein phosphatase, Mg2+/Mn2+ dependent, 1K                                      | 1.587767862      |
| WDR45             | —                                                                                             | 1.52414483     | EIF2AK2                  | eukaryotic translation initiation factor 2-alpha kinase 2                         | 1.584469622      |
| SRNG1             | strawberry notch homolog 1 (Drosophila)                                                       | 1.52414483     | NCKAIP1                  | NCK-associated protein 1-like                                                     | 1.584469622      |
| SNIC5             | structural maintenance of chromosomes 5                                                       | 1.523088874    | CYTH4                    | cytohesin 4                                                                       | 1.581178233      |
| ERBB2IP           | —                                                                                             | 1.523088874    | SRP54                    | signal recognition particle 54kDa                                                 | 1.581178233      |
| REV3L             | REV3-like, polymerase (DNA directed), zeta, catalytic subunit                                 | 1.522033381    | SEC13                    | SEC13 homolog (S. cerevisiae)                                                     | 1.580082624      |
| LZFL1             | leucine zipper transcription factor-like 1                                                    | 1.522033381    | CAUR                     | calreticulin                                                                      | 1.578987773      |
| TCFL5             | transcription factor-like 5 (basic helix-loop-helix)                                          | 1.520978753    | CLEFAC                   | —                                                                                 | 1.578987773      |
| ANK2              | —                                                                                             | 1.519924856    | IGFBP2                   | insulin-like growth factor binding protein 2, 36kDa                               | 1.577893682      |
| VWF               | von Willebrand factor                                                                         | 1.519924856    | PSMD14                   | proteasome (prosome, macropain) 26S subunit, non-AIPase, 14                       | 1.577893682      |
| DDPEY2            | doppel family member 2                                                                        | 1.51887169     | AIF3                     | activating transcription factor 3                                                 | 1.574615953      |
| MAI22             | matrilin 2                                                                                    | 1.51887169     | LAI1R1                   | leukocyte-associated immunoglobulin-like receptor 1                               | 1.570256237      |
| KDM6C             | lysine (K)-specific demethylase 5C                                                            | 1.517819253    | CCNG1                    | cyclin G1                                                                         | 1.568080908      |
| CC14              | chaperonin containing TCP1, subunit 4 (delta)                                                 | 1.517819253    | CXCL16                   | chemokine (C-X-C motif) ligand 16                                                 | 1.568080908      |
| PNM2D1            | peptidase M20 domain containing 1                                                             | 1.516767545    | ACF5                     | killer cell lectin-like receptor, subfamily A, member 2                           | 1.566994374      |
| SOX2              | SRY (sex determining region Y)-box 2                                                          | 1.515716567    | Kira2                    | integrin, beta 6                                                                  | 1.565908593      |
| C16orf87          | chromosome 16 open reading frame 87                                                           | 1.515716567    | ITGB6                    | transmembrane protein 176A                                                        | 1.564823563      |
| PP1G              | peptidylprolyl isomerase G (cyclophilin G)                                                    | 1.514666316    | TMEM176A                 | eukaryotic translation initiation factor 4 gamma, 1                               | 1.563739286      |
| CTSF              | cathespin F                                                                                   | 1.514666316    | EIF4G1                   | plasmalemma vesicle associated protein                                            | 1.561572985      |
| DDI2              | DNA-damage inducible 1 homolog 2 (S. cerevisiae)                                              | 1.514666316    | PLIAP                    | —                                                                                 | 1.561572985      |

Continued on next page

Supplementary Table S3. Continued.

| Symbol   | Gene name                                                                               | Fold change up | Symbol            | Gene name                                                                                                      | Fold change down |
|----------|-----------------------------------------------------------------------------------------|----------------|-------------------|----------------------------------------------------------------------------------------------------------------|------------------|
| CBLR     | Cbl proto-oncogene B, E3 ubiquitin protein ligase                                       | 1.513616793    | TNFSF13B          | tumor necrosis factor (ligand) superfamily, member 13b                                                         | 1.56049096       |
| GRR126   | G protein-coupled receptor 126                                                          | 1.513616793    | API32             | adaptor-related protein complex 1, sigma 2 subunit                                                             | 1.56049096       |
| TNEM201  | transmembrane protein 201                                                               | 1.512567997    | CAULM14           | caudal-like 4                                                                                                  | 1.568329159      |
| GRIPEL2  | GripE-like 2, mitochondrial (E. coli)                                                   | 1.512567997    | THRSP             | thyroid hormone responsive                                                                                     | 1.568329159      |
| KLHL24   | kelch-like family member 24                                                             | 1.511519928    | TNEM256           | transmembrane protein 256                                                                                      | 1.568329159      |
| FOXK1    | forkhead box K1                                                                         | 1.510472586    | C19orf38          | chromosome 19 open reading frame 38                                                                            | 1.568329159      |
| MAP1LC3B | microtubule-associated protein 1 light chain 3 beta                                     | 1.50733491     | TAC1              | tachykinin precursor 1                                                                                         | 1.568329159      |
| GNAL14   | guanine nucleotide binding protein 1 light chain, alpha 14                              | 1.506290467    | TGFB2             | transforming growth factor, beta 2                                                                             | 1.568329159      |
| GRAM     | glycerol-3-phosphate acyltransferase, mitochondrial                                     | 1.506290467    | C14orf2           | chromosome 14 open reading frame 2                                                                             | 1.557249382      |
| SPARC    | secreted protein, acidic, cysteine-rich (osteonectin)                                   | 1.506290467    | S100A8            | S100 calcium binding protein A8                                                                                | 1.557249382      |
| AKAP12   | A kinase (PRKA) anchor protein 12                                                       | 1.506290467    | ALOX5AP           | arachidonate 5-lipoxygenase-activating protein                                                                 | 1.557249382      |
| TNPO1    | transporin 1                                                                            | 1.506290467    | SRXN1             | sulfiredoxin 1                                                                                                 | 1.556170353      |
| COON     | cell adhesion associated, oncogene regulated                                            | 1.506290467    | TNFSF10           | tumor necrosis factor (ligand) superfamily, member 10                                                          | 1.555920272      |
| DCDC2    | doublecortin domain containing 2                                                        | 1.505246747    | RC3H2             | ring finger and CCCH-type domains 2                                                                            | 1.554014538      |
| CIDN12   | claudin 12                                                                              | 1.505246747    | GAUNT1            | UDP-N-acetyl-alpha-D-galactosamine:poly(epsilon-L-glutamic acid) N-acetylglucosaminyltransferase 1 (GalNAc-T1) | 1.55293775       |
| KLHL21   | kelch-like family member 21                                                             | 1.504203751    | TUBA1A            | tubulin, alpha 1a                                                                                              | 1.55293775       |
| PLEKHH1  | pleckstrin homology domain containing, family H (with MYTH domain) member 1             | 1.504203751    | USMG5             | up-regulated during skeletal muscle growth 5 homolog (mouse)                                                   | 1.50786413       |
| MYO6     | myosin VI                                                                               | 1.504203751    | SFC33             | signal peptidase complex subunit 3 homolog (S. cerevisiae)                                                     | 1.50786413       |
| PEL2     | pellino E3 ubiquitin protein ligase family member 2                                     | 1.503161478    | COX7A1            | cytochrome c oxidase subunit VIIa polypeptide 1 (muscle)                                                       | 1.548638056      |
| MFN1     | mitofusin 1                                                                             | 1.503161478    | Gmi16440          | —                                                                                                              | 1.547564994      |
|          |                                                                                         |                | (includes others) |                                                                                                                |                  |
| APPL2    | adaptor protein, phosphotyrosine interaction, PH domain and leucine zipper containing 2 | 1.503161478    | CCL7              | chemokine (C-C motif) ligand 7                                                                                 | 1.546492675      |
| STAU2    | staufen double-stranded RNA binding protein 2                                           | 1.502119927    | Gp49a/Il1rb4      | leukocyte immunoglobulin-like receptor, subfamily B, member 4                                                  | 1.546492675      |
| NFXL1    | nuclear transcription factor X-box binding-like 1                                       | 1.502119927    | FAT2H             | fatty acid 2-hydroxylase                                                                                       | 1.546492675      |
| SIC2&46  | solute carrier family 26 (anion exchanger), member 6                                    | 1.500038989    | FAM49B            | family with sequence similarity 49, member B                                                                   | 1.544350266      |
|          |                                                                                         |                | TMM48B            | translocase of inner mitochondrial membrane 8 homolog B (yeast)                                                | 1.542210825      |
|          |                                                                                         |                | Tpm4              | tropomyosin 4                                                                                                  | 1.542210825      |
|          |                                                                                         |                | ASGR1             | asialoglycoprotein receptor 1                                                                                  | 1.541142217      |
|          |                                                                                         |                | Sec61g            | SEC61, gamma subunit                                                                                           | 1.541142217      |
|          |                                                                                         |                | PAPP14            | poly (ADP-ribose) polymerase family, member 14                                                                 | 1.53900722       |
|          |                                                                                         |                | FAM177A1          | family with sequence similarity 177, member A1                                                                 | 1.537940831      |
|          |                                                                                         |                | CXCL10            | chemokine (C-X-C motif) ligand 10                                                                              | 1.536875181      |
|          |                                                                                         |                | LBH               | limb bud and heart development                                                                                 | 1.536875181      |
|          |                                                                                         |                | OSTC              | oligosaccharyltransferase complex subunit (non-catalytic)                                                      | 1.527317498      |
|          |                                                                                         |                | IL2RG             | interleukin 2 receptor, gamma                                                                                  | 1.527317498      |
|          |                                                                                         |                | HFGDS             | hematopoietic prostaglandin D synthase                                                                         | 1.52039677       |
|          |                                                                                         |                | SOC33             | suppressor of cytokine signaling 3                                                                             | 1.52039677       |
|          |                                                                                         |                | MAINF             | —                                                                                                              | 1.52414483       |
|          |                                                                                         |                | GZMA              | granzyme A (granzyme 1, cytotoxic T-lymphocyte-associated serine esterase 3)                                   | 1.52414483       |
|          |                                                                                         |                | IGFALS            | insulin-like growth factor binding protein, acid labile subunit                                                | 1.52414483       |
|          |                                                                                         |                | CCND2             | cyclin D2                                                                                                      | 1.522033381      |
|          |                                                                                         |                | PNPT1             | polyribonucleotide nucleotidyltransferase 1                                                                    | 1.522033381      |
|          |                                                                                         |                | EDN3              | endothelin 3                                                                                                   | 1.51887169       |
|          |                                                                                         |                | Cd69a             | CD69a antigen                                                                                                  | 1.517819253      |
|          |                                                                                         |                | NDUFB2            | NADH dehydrogenase (ubiquinone) 1 beta subcomplex 2, 8kDa                                                      | 1.515716567      |
|          |                                                                                         |                | PRRX1             | paired related homeobox 1                                                                                      | 1.515716567      |
|          |                                                                                         |                | C1GALT1           | core 1 synthase, glycoprotein-N-acetylgalactosamine 3-beta-galactosyltransferase, 1                            | 1.514666316      |
|          |                                                                                         |                | PSME2             | proteasome (prosome, macropain) activator subunit 2 (PA28 beta)                                                | 1.514666316      |
|          |                                                                                         |                | PDCD10            | programmed cell death 10                                                                                       | 1.513616793      |
|          |                                                                                         |                | PPL1              | peptidylprolyl isomerase (cyclophilin)-like 1                                                                  | 1.512567997      |
|          |                                                                                         |                | TRUB2             | —                                                                                                              | 1.512567997      |
|          |                                                                                         |                | SAAT1             | serum amyloid A1                                                                                               | 1.512567997      |
|          |                                                                                         |                | TPGS2             | tubulin polyglutamylase complex subunit 2                                                                      | 1.510472586      |
|          |                                                                                         |                | MRROS             | negative regulator of reactive oxygen species                                                                  | 1.509425949      |
|          |                                                                                         |                | DOCK2             | dedicator of cytokinesis 2                                                                                     | 1.508338077      |
|          |                                                                                         |                | CXCL11            | —                                                                                                              | 1.50733491       |
|          |                                                                                         |                | SREBF1            | sterol regulatory element binding transcription factor 1                                                       | 1.506290467      |
|          |                                                                                         |                | CSRNP1            | cysteine-serine-rich nuclear protein 1                                                                         | 1.506290467      |
|          |                                                                                         |                | S100A10           | S100 calcium binding protein A10                                                                               | 1.505246747      |
|          |                                                                                         |                | TU886             | tubulin, beta 6 class V                                                                                        | 1.505246747      |
|          |                                                                                         |                | ASB2              | ankyrin repeat and SOCS box containing 2                                                                       | 1.505246747      |
|          |                                                                                         |                | CHPT1             | choline phosphotransferase 1                                                                                   | 1.503161478      |
|          |                                                                                         |                | MYCBP             | MYC binding protein                                                                                            | 1.502119927      |
|          |                                                                                         |                | FGFBP1            | fibroblast growth factor binding protein 1                                                                     | 1.500038989      |
|          |                                                                                         |                | PODLX             | podocalyxin-like                                                                                               | 1.500038989      |

Supplementary Table S4. RT+HBOV vs. control.

| Symbol  | Gene name                                                                                      | Fold change up | Symbol                 | Gene name                                                                                                                    | Fold change down |
|---------|------------------------------------------------------------------------------------------------|----------------|------------------------|------------------------------------------------------------------------------------------------------------------------------|------------------|
| DBP     | D. site of albumin promoter (albumin D-box) binding protein                                    | 89.39          | ARNTL                  | aryl hydrocarbon receptor nuclear translocatorlike                                                                           | 8.88             |
| USP2    | ubiquitin specific peptidase 2                                                                 | 6.86           | NPA52                  | neuronal PAS domain protein 2                                                                                                | 6.95             |
| CA3     | carbonic anhydrase III, muscle specific                                                        | 4.84           | IGJ                    | immunoglobulin J polypeptide, linker protein for immunoglobulin alpha and mu polypeptides                                    | 4.65             |
| PAG1    | phosphoprotein associated with glycosphingolipid microdomains 1                                | 4.53           | IGHA1                  | immunoglobulin heavy constant alpha 1                                                                                        | 4.34             |
| DUSP4   | dual specificity phosphatase 4                                                                 | 4.43           | CXCL13                 | chemokine (C-X-C motif) ligand 13                                                                                            | 3.63             |
| TEF     | thymotrophic embryonic factor                                                                  | 3.90           | IGV1                   | immunoglobulin lambda variable 1                                                                                             | 3.15             |
| EDA2R   | ectodysplasin A2 receptor                                                                      | 3.86           | ARL4A                  | ADP-ribosylation factor-like 4A                                                                                              | 2.85             |
| CHAC1   | ChAc, cation transport regulator homolog 1 (E. coli)                                           | 3.79           | KLK3                   | kallikrein-related peptidase 3                                                                                               | 2.80             |
| PER3    | period circadian clock 3                                                                       | 3.59           | IGHM                   | immunoglobulin heavy constant mu                                                                                             | 2.68             |
| GRR155  | G protein-coupled receptor 155                                                                 | 3.55           | NFIL3                  | nuclear factor, interleukin 3 regulated                                                                                      | 2.62             |
| CFD     | complement factor D (gadpsin)                                                                  | 3.43           | RHOJ                   | ras homolog family member J                                                                                                  | 2.51             |
| KCNE1   | potassium voltage-gated channel, Iik-related family, member 1                                  | 1.82           | Foln1                  | folate hydrolase 1                                                                                                           | 2.48             |
| Reg3g   | regenerating islet-derived 3 gamma                                                             | 1.81           | ZC3H12D                | zinc finger CCHC-type containing 12D                                                                                         | 2.46             |
| AZIN1   | antizyme inhibitor 1                                                                           | 1.80           | MZB1                   | marginal zone B and B1 cell-specific protein                                                                                 | 2.43             |
| SOX2    | SRY (sex determining region Y)-box 2                                                           | 1.80           | NABP1                  | nucleic acid binding protein 1                                                                                               | 2.42             |
| TOP2A   | topoisomerase (DNA) II alpha 170kDa                                                            | 1.80           | GPR31                  | G protein-coupled receptor 31                                                                                                | 2.29             |
| GALNT6  | UDP-N-acetyl-alpha-D-galactosamine polypeptide N-acetylgalactosaminyltransferase 6 (GalNAc-T6) | 1.80           | SIC16A6                | solute carrier family 16, member 6                                                                                           | 2.24             |
| PDE4DIP | phosphodiesterase 4D interacting protein                                                       | 1.79           | TACR3                  | tachykinin receptor, 3                                                                                                       | 2.15             |
| CDCA8   | cell division cycle associated 8                                                               | 1.79           | ASGR1                  | asialoglycoprotein receptor 1                                                                                                | 2.13             |
| ENPPD7  | ectonucleoside triphosphate diphosphohydrolase 7                                               | 1.79           | CIRBP                  | cold inducible RNA binding protein                                                                                           | 2.07             |
| SULF2   | sulfatase 2                                                                                    | 1.78           | INSIG1                 | insulin induced gene 1                                                                                                       | 2.03             |
| FUS     | fused in sarcoma                                                                               | 1.77           | RAB27B                 | RAB27B, member RAS oncogene family                                                                                           | 2.02             |
| SLC23A2 | solute carrier family 23 (ascorbic acid transporter), member 2                                 | 1.77           | PK3R1                  | phosphoinositide-3-kinase, regulatory subunit 1 (alpha)                                                                      | 2.01             |
| XIST    | X inactive specific transcript (non-protein coding)                                            | 1.77           | JUN                    | jun proto-oncogene                                                                                                           | 1.99             |
| SLC5A3  | solute carrier family 5 (sodium/myo-inositol cotransporter), member 3                          | 1.76           | CLDN1                  | claudin 1                                                                                                                    | 1.97             |
| PKM3    | pim-3 oncogene                                                                                 | 1.76           | Igk                    | immunoglobulin kappa chain complex                                                                                           | 1.96             |
| BFA2    | BPI fold containing family A, member 2                                                         | 1.75           | OSGIN2                 | oxidative stress induced growth inhibitor family member 2                                                                    | 1.94             |
| GPCPD1  | glycerophosphocholine phosphodiesterase GBE1 homolog (S. cerevisiae)                           | 1.75           | RAB17                  | RAB17, member RAS oncogene family                                                                                            | 1.91             |
| HERPUD1 | homocysteine-inducible, endoplasmic reticulum stress-inducible, ubiquitin-like domain member 1 | 1.75           | GULP1                  | GULP engulfment adaptor PTB domain containing 1                                                                              | 1.88             |
| BAX     | BCL2-associated X protein                                                                      | 1.75           | DLEU7                  | deleted in lymphocytic leukemia, 7                                                                                           | 1.88             |
| BHLHE40 | basic helix-loop-helix family, member e40                                                      | 1.75           | PK3CG                  | phosphatidylinositol-4,5-bisphosphate 3-kinase, catalytic subunit gamma                                                      | 1.87             |
| LCOR    | ligand dependent nuclear receptor corepressor                                                  | 1.74           | SULT1C3                | sulfotransferase family, cytosolic, 1C, member 3                                                                             | 1.86             |
| CARS    | cysteine-HRNA synthetase                                                                       | 1.74           | HIST1HC                | histone cluster 1, H1C                                                                                                       | 1.80             |
| AAARS   | alanyl-HRNA synthetase                                                                         | 1.74           | Cpsr (includes others) | —                                                                                                                            | 1.80             |
| C1GALT1 | core 1 synthase, glycoprotein-N-acetylgalactosamine 3-beta-galactosyltransferase, 1            | 1.74           | ID1                    | —                                                                                                                            | 1.79             |
| AUTS2   | —                                                                                              | 1.74           | ABO                    | ABO blood group, transferase A, alpha 1-3-N-acetylgalactosaminyltransferase; transferase B, alpha 1-3-galactosyltransferase) | 1.77             |
| GRB10   | growth factor receptor-bound protein 10                                                        | 1.73           | Grf13                  | glutathione S-transferase, theta 3                                                                                           | 1.75             |
| UCP2    | uncoupling protein 2 (mitochondrial, proton carrier)                                           | 1.73           | CHST3                  | carbohydrate (chondroitin-4) sulfotransferase 13                                                                             | 1.75             |
| ZNFX319 | zinc finger protein 319                                                                        | 1.73           | SERPIN9                | serpin peptidase inhibitor, clade B (ovalbumin), member 9                                                                    | 1.74             |
| SLCSA1  | solute carrier family 5 (sodium/glucose cotransporter), member 1                               | 1.73           | Cdorr32                | chromosome 4 open reading frame 32                                                                                           | 1.74             |
| ANGPTL4 | angiopoietin-like 4                                                                            | 1.73           | PPRD2                  | regulation of nuclear pre-miRNA domain containing 2                                                                          | 1.74             |
| LUC7L2  | LUC7-like 2 (S. cerevisiae)                                                                    | 1.72           | Cest1d                 | carboxylesterase 1D                                                                                                          | 1.73             |
| COL17A1 | collagen, type XVII, alpha 1                                                                   | 1.72           | CAMK2D                 | calcium/calmodulin-dependent protein kinase II delta                                                                         | 1.72             |
| SLC12A1 | solute carrier family 12 (sodium/potassium/chloride transporter), member 1                     | 1.72           | B4GALU6                | UDP-Gal:betaGalNAc-beta 1,4-galactosyltransferase, polypeptide 6                                                             | 1.72             |
| TP53NP1 | tumor protein p53 inducible nuclear protein 1                                                  | 1.71           | SRXN1                  | sulfiredoxin 1                                                                                                               | 1.71             |
| PNN     | pilin, desmosome associated protein                                                            | 1.71           | UCWA                   | upper zone of growth plate and cartilage matrix associated                                                                   | 1.71             |
| IGDCC4  | immunoglobulin superfamily DCC subclass, member 4                                              | 1.71           | LDLR                   | low density lipoprotein receptor                                                                                             | 1.70             |
| KLIF5   | Kruppel-like factor 5 (testis)                                                                 | 1.71           | HLA-C                  | major histocompatibility complex, class I, C                                                                                 | 1.70             |
| SLC14A4 | solute carrier family 14 (glutamate/neutral amino acid transporter), member 4                  | 1.71           | BIG2                   | BIG family, member 2                                                                                                         | 1.69             |
| TXNIP   | thioredoxin interacting protein                                                                | 1.70           | FABP5                  | —                                                                                                                            | 1.69             |
| RSAD1   | radical S-adenosyl methionine domain containing 1                                              | 1.70           | CUN8                   | ceroid-lipofuscinosis, neuronal 8 (epilepsy, progressive with mental retardation)                                            | 1.69             |
| CTGF    | connective tissue growth factor                                                                | 1.70           | FOXO1                  | forkhead box O1                                                                                                              | 1.67             |
| FUBP1   | far upstream element (FUSE) binding protein 1                                                  | 1.70           | SCD                    | stearoyl-CoA desaturase (delta-9-desaturase)                                                                                 | 1.67             |
| MHR9    | myosin, heavy chain 9, non-muscle                                                              | 1.70           | ARHGEF37               | Rho guanine nucleotide exchange factor (GEF) 37                                                                              | 1.66             |
| PABPN1  | poly(A) binding protein, nuclear 1                                                             | 1.69           | MAN1C1                 | mammoside, alpha, class 1C, member 1                                                                                         | 1.66             |
| WNK2    | WNK lysine deficient protein kinase 2                                                          | 1.69           | SDCA4                  | syndecan 4                                                                                                                   | 1.66             |
| HSPA8   | heat shock 70kDa protein 8                                                                     | 1.69           | LYPD6                  | —                                                                                                                            | 1.66             |
| SUZ12   | SUZ12 polycomb repressive complex 2 subunit                                                    | 1.69           | CHMP2B                 | charged multivesicular body protein 2B                                                                                       | 1.66             |
| PTFR2   | protein tyrosine phosphatase, receptor type, N polypeptide 2                                   | 1.69           | 5033430115Rk           | RKEN cDNA 5033430115 gene                                                                                                    | 1.65             |
| Cbr04   | chromosome 8 open reading frame 4                                                              | 1.69           | Sp100                  | nuclear antigen Sp100                                                                                                        | 1.65             |
| Acoat1b | acyl-Coenzyme A, acyltransferase 1B                                                            | 1.67           | SRP54                  | signal recognition particle 54kDa                                                                                            | 1.64             |
| IRS2    | insulin receptor substrate 2                                                                   | 1.67           | ARHGAP29               | Rho GTPase activating protein 29                                                                                             | 1.64             |
| CFR66   | —                                                                                              | 1.67           | SLC29A1                | solute carrier family 29 (equilibrative nucleoside transporter), member 1                                                    | 1.64             |
| RP524   | ceramide synthase 6                                                                            | 1.67           | LY6G6D                 | lymphocyte antigen 6 complex, locus G6D                                                                                      | 1.64             |
| MEIS1   | —                                                                                              | 1.67           | FMO2                   | flavin containing monooxygenase 2 (non-functional)                                                                           | 1.64             |
| RAP1H   | Meis homeobox 1                                                                                | 1.66           | ZNFHC2                 | zinc finger, DHRF-type containing 2                                                                                          | 1.63             |
|         | Ras association (RalGDS/AF-6) and plectstrin homology domains 1                                |                |                        |                                                                                                                              |                  |

Continued on next page

Supplementary Table S4. Continued.

| Symbol        | Gene name                                                                                     | Fold change up | Symbol    | Gene name                                                                 | Fold change down |
|---------------|-----------------------------------------------------------------------------------------------|----------------|-----------|---------------------------------------------------------------------------|------------------|
| TRIM24        | —                                                                                             | 1.66           | Ccorf1    | —                                                                         | 1.62             |
| CPY2          | cryptochrome 2 (photolyase-like)                                                              | 1.66           | VEGFC     | vascular endothelial growth factor C                                      | 1.62             |
| MYO1          | myosin                                                                                        | 1.66           | VAV2      | vav 2 guanine nucleotide exchange factor                                  | 1.61             |
| NFE2L2        | nuclear factor, erythroid 2-like 2                                                            | 1.66           | FgfR3     | fibroblast growth factor binding protein 3                                | 1.61             |
| STIM1         | stathmin 1                                                                                    | 1.65           | STAT5A    | signal transducer and activator of transcription 5A                       | 1.60             |
| PRAT          | phosphoribosyl pyrophosphate amidotransferase asparaginase like 1                             | 1.65           | GABARAPL1 | GABA(A) receptor-associated protein like 1                                | 1.60             |
| ASRGL1        | asparaginase like 1                                                                           | 1.65           | TJP3      | —                                                                         | 1.60             |
| FAM46B        | family with sequence similarity 46, member B                                                  | 1.65           | GCAT      | glycine C-acetyltransferase                                               | 1.60             |
| APAF          | v-rat murine sarcoma 3611 viral oncogene homolog                                              | 1.65           | APORR     | apolipoprotein B receptor                                                 | 1.60             |
| NANP          | N-acetylneuraminic acid phosphatase                                                           | 1.64           | LEO1      | Leol1, Paf1 /RNA polymerase II complex component, homolog (S. cerevisiae) | 1.60             |
| FARP2         | FERM, RhoGEF and pleckstrin domain protein 2                                                  | 1.64           | DNAJC12   | DnaJ (Hsp40) homolog, subfamily C, member 12                              | 1.59             |
| CCR2          | chemokine (C-C motif) receptor 2                                                              | 1.64           | H2-124    | histocompatibility 2, 1 region locus 24                                   | 1.59             |
| RBP6          | retinoblastoma binding protein 6                                                              | 1.64           | Ces1e     | carboxylesterase 1E                                                       | 1.59             |
| KDM5C         | lysine (K)-specific demethylase 5C                                                            | 1.64           | DDX6      | DEAD (Asp-Glu-Ala-Asp) box helicase 6                                     | 1.59             |
| SRK1          | SH3-binding domain kinase 1                                                                   | 1.64           | NABP21    | NEDD4 binding protein 2, like 1                                           | 1.59             |
| NCA9H         | —                                                                                             | 1.64           | ARMC8     | armadillo repeat containing 8                                             | 1.59             |
| GTPBP4        | GTP binding protein 4                                                                         | 1.64           | FAM69A    | family with sequence similarity 69, member A                              | 1.59             |
| RPL41         | ribosomal protein L41                                                                         | 1.64           | HLA-DOA   | major histocompatibility complex, class II, DO alpha                      | 1.59             |
| NBR4A3        | nuclear receptor subfamily 4, group A, member 3                                               | 1.64           | SMIM3     | small integral membrane protein 3                                         | 1.58             |
| ZNF7          | zinc finger protein 7                                                                         | 1.63           | PISR      | polymeric immunoglobulin receptor                                         | 1.57             |
| ANXA3         | annexin A3                                                                                    | 1.63           | COCH      | —                                                                         | 1.57             |
| VANGL1        | VANGL planar cell polarity protein 1                                                          | 1.63           | GNG4      | —                                                                         | 1.57             |
| RCN1          | reticulocalbin 1, EF-hand calcium binding domain                                              | 1.63           | RHOBTB3   | Rho-related BTB domain containing 3                                       | 1.57             |
| ISM1          | isthmin 1, angiogenesis inhibitor                                                             | 1.63           | POLB      | polymerase (DNA directed), beta                                           | 1.56             |
| GALNT4        | UDP-N-acetyl-alpha-D-galactosamine polypeptide N-acetylgalactosaminyltransferase 4 (GalNAcT4) | 1.63           | TAPBP1    | TAP binding protein-like                                                  | 1.55             |
| THRAP3        | thyroid hormone receptor associated protein 3                                                 | 1.63           | SQLE      | squalene epoxidase                                                        | 1.55             |
| NDN           | nectin, melanoma antigen (MAGE) family member                                                 | 1.62           | CM1M7     | CKLF-like MARVEL transmembrane domain containing 7                        | 1.55             |
| ZNF461        | zinc finger protein 461                                                                       | 1.62           | ITGB6     | integrin, beta 6                                                          | 1.55             |
| NUS1          | nuclear undecaprenyl pyrophosphate synthase 1 homolog (S. cerevisiae)                         | 1.62           | RVN2      | formin 2                                                                  | 1.55             |
| LAMA3         | laminin, alpha 3                                                                              | 1.62           | SVZB      | synaptic vesicle glycoprotein 2B                                          | 1.55             |
| TAF4          | TAF4 RNA polymerase II, TATA box binding protein (TBP)-associated factor, 135kDa              | 1.62           | EFNA1     | ephrin-A1                                                                 | 1.55             |
| C1orf51       | chromosome 1 open reading frame 51                                                            | 1.62           | PHF11     | —                                                                         | 1.54             |
| SSX2IP        | synovial sarcoma, X breakpoint 2 interacting protein                                          | 1.61           | CLEC2D    | C-type lectin domain family 2, member D                                   | 1.54             |
| HSDL2         | hydroxysteroid dehydrogenase like 2                                                           | 1.61           | TMEM54    | transmembrane protein 54                                                  | 1.54             |
| PTRT          | —                                                                                             | 1.61           | PNRC1     | proline-rich nuclear receptor coactivator 1                               | 1.54             |
| SEMA3D        | sema domain, immunoglobulin domain (Ig), short basic domain, secreted, (semaphorin) 3D        | 1.61           | SCN8A     | sodium channel, voltage gated, type VIII, alpha subunit                   | 1.53             |
| TNRC6A        | truncaloid repeat containing 6A                                                               | 1.61           | PNM1      | phosphotransferase 1                                                      | 1.53             |
| KPNA1         | karyopherin alpha 1 (importin, alpha 5)                                                       | 1.60           | TIPA      | tocopherol (alpha) transfer protein                                       | 1.53             |
| PBK           | PDZ binding kinase                                                                            | 1.60           | MSI2      | musashi RNA-binding protein 2                                             | 1.52             |
| XPOT          | —                                                                                             | 1.60           | TAB2      | TGF-beta activated kinase 1/MAP3K7 binding protein 2                      | 1.51             |
| MARCH7        | membrane-associated ring finger (C3HC4) 7, E3 ubiquitin protein ligase                        | 1.60           | METTL1    | methyltransferase like 1                                                  | 1.51             |
| FNT1          | fibronectin 1                                                                                 | 1.60           | IFNGR2    | interferon gamma receptor 2 (interferon gamma transducer 1)               | 1.51             |
| NCOL1         | nuclear and colloid-body phosphoprotein 1                                                     | 1.60           | CHPT1     | choline phosphotransferase 1                                              | 1.50             |
| STOX2         | storkhead box 2                                                                               | 1.59           | CPD       | carboxypeptidase D                                                        | 1.50             |
| ALTB2         | ankyrin repeat and BTB (POZ) domain containing 2                                              | 1.59           |           |                                                                           |                  |
| KLF4          | Kruppel-like factor 4 (gulf)                                                                  | 1.59           |           |                                                                           |                  |
| FOXP1         | forkhead box P1                                                                               | 1.59           |           |                                                                           |                  |
| ADORA1        | adenosine A1 receptor                                                                         | 1.58           |           |                                                                           |                  |
| ATF4          | activating transcription factor 4                                                             | 1.58           |           |                                                                           |                  |
| TRIB3         | tribbles homolog 3 (Drosophila)                                                               | 1.58           |           |                                                                           |                  |
| DCXR          | —                                                                                             | 1.58           |           |                                                                           |                  |
| LMNA          | lamin A/C                                                                                     | 1.58           |           |                                                                           |                  |
| AHCY1         | AT hook containing transcription factor 1                                                     | 1.58           |           |                                                                           |                  |
| STB3A6        | S18 alpha-N-acetyl-neuramide alpha-2,8-sialyltransferase 6                                    | 1.58           |           |                                                                           |                  |
| DYRK3         | dual-specificity tyrosine-(Y)-phosphorylation regulated kinase 3                              | 1.57           |           |                                                                           |                  |
| ASPH          | aspartate beta-hydroxylase                                                                    | 1.57           |           |                                                                           |                  |
| let-7         | microRNA let-7a-1                                                                             | 1.57           |           |                                                                           |                  |
| CGN1Z         | cyolin 1Z                                                                                     | 1.57           |           |                                                                           |                  |
| CGN1Z         | —                                                                                             | 1.57           |           |                                                                           |                  |
| TAR5          | threonyl-HRNA synthetase                                                                      | 1.57           |           |                                                                           |                  |
| TNC           | —                                                                                             | 1.57           |           |                                                                           |                  |
| TULP4         | tubby like protein 4                                                                          | 1.56           |           |                                                                           |                  |
| CHEB3         | cytoplasmic polyadenylation element binding protein 3                                         | 1.56           |           |                                                                           |                  |
| G-CLC         | glutamate-cysteine ligase, catalytic subunit                                                  | 1.56           |           |                                                                           |                  |
| ZNF281        | zinc finger protein 281                                                                       | 1.56           |           |                                                                           |                  |
| TP63          | tumor protein p63                                                                             | 1.56           |           |                                                                           |                  |
| ERO1L         | ERO1-like (S. cerevisiae)                                                                     | 1.56           |           |                                                                           |                  |
| Ccnb1/Gmt5593 | cyolin B1                                                                                     | 1.55           |           |                                                                           |                  |
| CCNA2         | cyolin A2                                                                                     | 1.55           |           |                                                                           |                  |
| KIF1B         | kinesin family member 1B                                                                      | 1.55           |           |                                                                           |                  |

Continued on next page

Supplementary Table S4. Continued.

| Symbol        | Gene name                                                              | Fold change up | Symbol | Gene name | Fold change down |
|---------------|------------------------------------------------------------------------|----------------|--------|-----------|------------------|
| MBP           | myelin basic protein                                                   | 1.55           |        |           |                  |
| MDM4          | Mdm4 p53 binding protein homolog (mouse)                               | 1.55           |        |           |                  |
| CLMN          | calmin (calponin-like, transmembrane)                                  | 1.55           |        |           |                  |
| ZMIZ1         | zinc finger, MIZ-type containing 1                                     | 1.55           |        |           |                  |
| EIF2D         | eukaryotic translation initiation factor 2D                            | 1.55           |        |           |                  |
| PDE4B         | phosphodiesterase 4B, cAMP-specific                                    | 1.55           |        |           |                  |
| MATN2         | matrin 2                                                               | 1.55           |        |           |                  |
| UVSSA         | UV-stimulated scaffold protein A                                       | 1.55           |        |           |                  |
| SYMM          | synemin, intermediate filament protein                                 | 1.55           |        |           |                  |
| SYT7          | synaptotagmin VII                                                      | 1.55           |        |           |                  |
| TARDBP        | TAR DNA binding protein                                                | 1.54           |        |           |                  |
| SLC38A2       | solute carrier family 38, member 2                                     | 1.54           |        |           |                  |
| DDIT4L        | —                                                                      | 1.54           |        |           |                  |
| RAK5          | arginyl-HRNA synthetase                                                | 1.54           |        |           |                  |
| HELZ2         | helicase with zinc finger 2, transcriptional coactivator               | 1.54           |        |           |                  |
| ARRDC4        | —                                                                      | 1.53           |        |           |                  |
| ANGPTL2       | angiotensin-like 2                                                     | 1.53           |        |           |                  |
| TRA2A         | transformer 2 alpha homolog (Drosophila)                               | 1.53           |        |           |                  |
| MYH11         | myosin, heavy chain 11, smooth muscle                                  | 1.53           |        |           |                  |
| KIAA0101      | —                                                                      | 1.53           |        |           |                  |
| KIAA0101      | apoptotic peptidase activating factor 1                                | 1.53           |        |           |                  |
| APAF1         | regulator of cell cycle                                                | 1.53           |        |           |                  |
| RGCC          | ubiquitin specific peptidase 7 (herpes virus-associated)               | 1.53           |        |           |                  |
| USP7          | se-1 suppressor of lin-12-like 3 (C. elegans)                          | 1.53           |        |           |                  |
| SEL1L3        | isoleucyl-HRNA synthetase                                              | 1.53           |        |           |                  |
| IAB5          | —                                                                      | 1.53           |        |           |                  |
| RC3RA         | RAR-related orphan receptor A                                          | 1.53           |        |           |                  |
| NTRK3         | neurotrophic tyrosine kinase, receptor, type 3                         | 1.53           |        |           |                  |
| THYNY1        | thymocyte nuclear protein 1                                            | 1.53           |        |           |                  |
| CEP55         | centrosomal protein 55kDa                                              | 1.53           |        |           |                  |
| BRD8          | bromodomain containing 8                                               | 1.53           |        |           |                  |
| Grn3515       | predicted gene.3515                                                    | 1.53           |        |           |                  |
| HSRA1A/HSRA1B | heat shock 70kDa protein 1A                                            | 1.52           |        |           |                  |
| PSFH          | phosphoserine phosphatase                                              | 1.52           |        |           |                  |
| KLF9          | Kruppel-like factor 9                                                  | 1.52           |        |           |                  |
| TSC2D23       | TSC22 domain family, member 3                                          | 1.52           |        |           |                  |
| RMV5          | RNA binding motif protein 5                                            | 1.52           |        |           |                  |
| SLAIN2        | SLAIN motif family, member 2                                           | 1.52           |        |           |                  |
| Aldh1a7       | aldehyde dehydrogenase family 1, subfamily A7                          | 1.52           |        |           |                  |
| KLF7          | —                                                                      | 1.52           |        |           |                  |
| SCARA3        | scavenger receptor class A, member 3                                   | 1.52           |        |           |                  |
| PNISR         | PNN-interacting serine/arginine-rich protein                           | 1.51           |        |           |                  |
| DNAJC10       | DnaJ (Hsp40) homolog, subfamily C, member 10                           | 1.51           |        |           |                  |
| MALTI         | mucosa associated lymphoid tissue lymphoma translocation gene 1        | 1.51           |        |           |                  |
| SLC3A2        | solute carrier family 3 (amino acid transporter heavy chain), member 2 | 1.51           |        |           |                  |
| PCMTD2        | —                                                                      | 1.51           |        |           |                  |
| rsRC2         | —                                                                      | 1.51           |        |           |                  |
| TIAM2         | arginine/serine-rich coiled-coil 2                                     | 1.51           |        |           |                  |
| AOC3          | T-cell lymphoma invasion and metastasis 2                              | 1.51           |        |           |                  |
| TMC7          | amine oxidase, copper containing 3                                     | 1.51           |        |           |                  |
| NFB           | transmembrane channel-like 7                                           | 1.51           |        |           |                  |
| SIGGAL1       | nuclear factor I/B                                                     | 1.51           |        |           |                  |
| FOXK1         | SI3 beta-galactoside alpha-2,3-sialyltransferase 1                     | 1.51           |        |           |                  |
| PCSTN         | forkhead box K1                                                        | 1.51           |        |           |                  |
| CDC42BP6      | perforin, osteoblast specific factor                                   | 1.51           |        |           |                  |
| ECT2          | CDC42 binding protein kinase gamma (DMPK-like)                         | 1.51           |        |           |                  |
| PEX11A        | —                                                                      | 1.51           |        |           |                  |
| CSMK1G1       | peroxisomal biogenesis factor 11, alpha                                | 1.51           |        |           |                  |
| POFU12        | casein kinase 1, gamma 1                                               | 1.51           |        |           |                  |
| UBE2B         | protein O-tucosyltransferase 2                                         | 1.51           |        |           |                  |
| Nik           | ubiquitin-conjugating enzyme E2B                                       | 1.50           |        |           |                  |
| BCLAF1        | —                                                                      | 1.50           |        |           |                  |
| OGT           | BCL2-associated transcription factor 1                                 | 1.50           |        |           |                  |
| SSR1          | O-linked N-acetylglucosamine (GlcNAc) transferase                      | 1.50           |        |           |                  |
| DDX21         | signal sequence receptor, alpha                                        | 1.50           |        |           |                  |
| TOX1AIP2      | DEAD (Asp-Glu-Ala-Asp) box helicase 21                                 | 1.50           |        |           |                  |
|               | tarsin A interacting protein 2                                         | 1.50           |        |           |                  |

Supplementary Table S5. RT+HBO<sub>2</sub> vs. RT.

| Symbol                  | Gene name                                                                         | Fold change up | Symbol    | Gene name                                                        | Fold change down |
|-------------------------|-----------------------------------------------------------------------------------|----------------|-----------|------------------------------------------------------------------|------------------|
| GAS5                    | growth arrest-specific 5 (non-protein coding)                                     | 2.7            | FOS       | FBJ murine osteosarcoma viral oncogene homolog                   | 15.5             |
| SOX2                    | SRY (sex determining region Y)-box 2                                              | 2.6            | EGR3      | early growth response 3                                          | 13.9             |
| TRFC                    | transferrin receptor                                                              | 2.6            | EGR1      | early growth response 1                                          | 12.2             |
| MEIS1                   | Meis homeobox 1                                                                   | 2.4            | DUSP1     | dual specificity phosphatase 1                                   | 10.6             |
| Mup1 (includes others)  |                                                                                   | 2.3            | JUN       | jun proto-oncogene                                               | 7.8              |
| MALAT1                  | metastasis associated lung adenocarcinoma transcript 1 (non-protein coding)       | 2.1            | Ptn1/Ptp2 | praline rich protein HaeIII subfamily 1                          | 5.6              |
| PABPC1                  | poly(A) binding protein, cytoplasmic 1                                            | 2.0            | BTG2      | BTG family member 2                                              | 4.9              |
| ESRRG                   | estrogen-related receptor gamma                                                   | 2.0            | EGR2      | early growth response 2                                          | 4.6              |
| TEF                     | thymotrophic embryonic factor                                                     | 1.9            | CYR61     | cysteine-rich, angiogenic inducer, 61                            | 4.6              |
| TARDBP                  | TAR DNA binding protein                                                           | 1.9            | IER3      | immediate early response 3                                       | 3.2              |
| Nik                     | —                                                                                 | 1.9            | IER2      | immediate early response 2                                       | 3.2              |
| Aco11                   | acyl-CoA thioesterase 1                                                           | 1.8            | ZFP36     | ZFP36 ring finger protein                                        | 3.0              |
| PNISR                   | PNU-interacting serine/arginine-rich protein                                      | 1.8            | JUNB      | jun B proto-oncogene                                             | 2.7              |
| KZFP2                   | IKAROS family zinc finger 2 (helix)                                               | 1.8            | CD83      | CD83 molecule                                                    | 2.2              |
| CtIP4                   | CAP-GLY domain containing linker protein family member 4                          | 1.8            | SOC33     | suppressor of cytokine signaling 3                               | 2.2              |
| MYOT                    | myofillin                                                                         | 1.8            | REN       | renin                                                            | 2.1              |
| Cxpr5 (includes others) |                                                                                   | 1.8            | LMCD1     | LIM and cysteine-rich domains 1                                  | 2.1              |
| KCNE1                   | potassium voltage-gated channel, Isk-related family, member 1                     | 1.8            | NGF       | nerve growth factor (beta polypeptide)                           | 1.8              |
| NFIB                    | nuclear factor I/B                                                                | 1.8            | FMN2      | formin 2                                                         | 1.8              |
| C1orf63                 | chromosome 1 open reading frame 63                                                | 1.7            | DYRK3     | dual-specificity tyrosine-(Y)-phosphorylation regulated kinase 3 | 1.8              |
| SYT7                    | synaptotagmin VII                                                                 | 1.7            | RET       | ret proto-oncogene                                               | 1.8              |
| FAM214A                 | family with sequence similarity 214, member A                                     | 1.7            | DITNA     | —                                                                | 1.7              |
| RBM5                    | RNA binding motif protein 5                                                       | 1.7            | FAM177A1  | family with sequence similarity 177, member A1                   | 1.7              |
| PER3                    | period circadian clock 3                                                          | 1.7            | KLK3      | kallikrein-related peptidase 3                                   | 1.6              |
| RBM25                   | RNA binding motif protein 25                                                      | 1.7            | MOB3B     | MOB kinase activator, 3B                                         | 1.6              |
| PGCMTD2                 | —                                                                                 | 1.7            | DUSP26    | dual specificity phosphatase 26 (putative)                       | 1.5              |
| MAPRE2                  | microtubule-associated protein, RP7EB family, member 2                            | 1.7            | C10orf90  | chromosome 10 open reading frame 90                              | 1.5              |
| SCRN3                   | secernin 3                                                                        | 1.7            |           |                                                                  |                  |
| AGFG2                   | —                                                                                 | 1.7            |           |                                                                  |                  |
| FOXP1                   | forkhead box P1                                                                   | 1.7            |           |                                                                  |                  |
| Mea3                    | maternally expressed 3                                                            | 1.7            |           |                                                                  |                  |
| CAS3C4                  | cancer susceptibility candidate 4                                                 | 1.7            |           |                                                                  |                  |
| TAF1D                   | TATA box binding protein (TBP)-associated factor, RNA polymerase I, D, 41kDa      | 1.6            |           |                                                                  |                  |
| PRPF4B                  | PRP4 pre-mRNA processing factor 4 homolog B (yeast)                               | 1.6            |           |                                                                  |                  |
| RPS24                   | —                                                                                 | 1.6            |           |                                                                  |                  |
| IGDCC4                  | immunoglobulin superfamily, DCC subclass, member 4                                | 1.6            |           |                                                                  |                  |
| SFPQ                    | splicing factor proline/glutamine-rich                                            | 1.6            |           |                                                                  |                  |
| NCALD                   | neurocadin delta                                                                  | 1.6            |           |                                                                  |                  |
| CLU                     | —                                                                                 | 1.6            |           |                                                                  |                  |
| B3GNT6                  | UDP-GlcNAc:betaGal beta-1,3-N-acetylgalactosaminyltransferase 6 (core 3 synthase) | 1.6            |           |                                                                  |                  |
| TASP1                   | taspace, threonine aspartase, 1                                                   | 1.6            |           |                                                                  |                  |
| APAF                    | v-rat murine sarcoma 3611 viral oncogene homolog                                  | 1.6            |           |                                                                  |                  |
| LUC7L2                  | LUC7-like 2 (S. cerevisiae)                                                       | 1.6            |           |                                                                  |                  |
| RPL41                   | ribosomal protein L41                                                             | 1.6            |           |                                                                  |                  |
| FGL2                    | fibinogen-like 2                                                                  | 1.6            |           |                                                                  |                  |
| PABPN1                  | poly(A) binding protein, nuclear 1                                                | 1.6            |           |                                                                  |                  |
| PGLYRP1                 | peptidoglycan recognition protein 1                                               | 1.6            |           |                                                                  |                  |
| SORBS2                  | sorbin and SH3 domain containing 2                                                | 1.6            |           |                                                                  |                  |
| SIC16A12                | solute carrier family 16, member 12                                               | 1.5            |           |                                                                  |                  |
| SLC36A2                 | solute carrier family 35 (UDP-galactose transporter), member A2                   | 1.5            |           |                                                                  |                  |
| BACE2                   | beta-site APP-cleaving enzyme 2                                                   | 1.5            |           |                                                                  |                  |
| Zfp157                  | zinc finger protein 157                                                           | 1.5            |           |                                                                  |                  |
| RPRED1A                 | regulation of nuclear pre-mRNA domain containing 1A                               | 1.5            |           |                                                                  |                  |
| Kat1a12b                | potassium channel tetramerisation domain containing 12b                           | 1.5            |           |                                                                  |                  |
| OGT                     | O-linked N-acetylglucosamine (GlcNAc) transferase                                 | 1.5            |           |                                                                  |                  |
| RMDN1                   | regulator of microtubule dynamics 1                                               | 1.5            |           |                                                                  |                  |
